# Supplementary material for: Agronomic impacts of chemically and microbiologically characterized compost tea in Mediterranean volcanic soils
Source: Front Plant Sci. 2025 Feb 28;16:1524884. doi: 10.3389/fpls.2025.1524884 (PMC11906438; doi:10.3389/fpls.2025.1524884)
Supplement: Supplementary file 1 [file Table1.xlsx]

## Sheet: Sheet1
Phylum	Class	Order	Family	Genus	Compost Tea1	Compost Tea2	Compost Tea3	Compost Tea4
Firmicutes	Clostridia	Lachnospirales	Lachnospiraceae	[Eubacterium] eligens group	60	0	0	0
Firmicutes	Clostridia	Lachnospirales	Lachnospiraceae	[Eubacterium] hallii group	358	274	201	263
Firmicutes	Clostridia	Lachnospirales	Lachnospiraceae	[Eubacterium] ruminantium group	68	0	0	0
Firmicutes	Clostridia	Lachnospirales	Lachnospiraceae	[Eubacterium] ventriosum group	0	0	0	0
Proteobacteria	Gammaproteobacteria	Burkholderiales	Comamonadaceae	[Polyangium] brachysporum group	0	0	0	0
Firmicutes	Clostridia	Lachnospirales	Lachnospiraceae	[Ruminococcus] gauvreauii group	66	87	0	0
Firmicutes	Clostridia	Lachnospirales	Lachnospiraceae	[Ruminococcus] torques group	52	88	0	115
Chloroflexi	Ktedonobacteria	Ktedonobacterales	Ktedonobacteraceae	1959-1	0	161	0	0
Verrucomicrobiota	Verrucomicrobiae	Opitutales	Puniceicoccaceae	A714019	0	0	0	92
Abditibacteriota	Abditibacteria	Abditibacteriales	Abditibacteriaceae	Abditibacterium	0	0	0	0
Firmicutes	Clostridia	Oscillospirales	Ethanoligenenaceae	Acetanaerobacterium	0	0	0	0
Firmicutes	Clostridia	Oscillospirales	Hungateiclostridiaceae	Acetivibrio	0	0	0	0
Firmicutes	Clostridia	Peptostreptococcales-Tissierellales	Peptostreptococcaceae	Acetoanaerobium	54	82	0	0
Firmicutes	Clostridia	Eubacteriales	Eubacteriaceae	Acetobacterium	0	0	0	0
Proteobacteria	Gammaproteobacteria	Burkholderiales	Alcaligenaceae	Achromobacter	516	793	604	376
Firmicutes	Bacilli	Alicyclobacillales	Alicyclobacillaceae	Acidibacillus	0	45	0	0
Proteobacteria	Gammaproteobacteria	Gammaproteobacteria Incertae Sedis	Unknown Family	Acidibacter	127	136	0	0
Proteobacteria	Alphaproteobacteria	Acetobacterales	Acetobacteraceae	Acidicaldus	0	0	0	95
Proteobacteria	Alphaproteobacteria	Acetobacterales	Acetobacteraceae	Acidisoma	0	0	0	0
Proteobacteria	Gammaproteobacteria	Burkholderiales	Comamonadaceae	Acidovorax	1010	552	196	275
Proteobacteria	Gammaproteobacteria	Pseudomonadales	Moraxellaceae	Acinetobacter	95	75	100	62
Actinobacteriota	Actinobacteria	Streptosporangiales	Streptosporangiaceae	Acrocarpospora	0	0	0	0
Bacteroidota	Bacteroidia	Flavobacteriales	Flavobacteriaceae	Actibacter	0	53	13	0
Proteobacteria	Alphaproteobacteria	Rhodobacterales	Rhodobacteraceae	Actibacterium	0	0	0	0
Actinobacteriota	Actinobacteria	Streptosporangiales	Thermomonosporaceae	Actinocorallia	0	0	0	126
Actinobacteriota	Actinobacteria	Streptosporangiales	Thermomonosporaceae	Actinomadura	0	0	0	0
Actinobacteriota	Actinobacteria	Pseudonocardiales	Pseudonocardiaceae	Actinophytocola	0	0	0	0
Actinobacteriota	Actinobacteria	Micromonosporales	Micromonosporaceae	Actinoplanes	0	0	0	0
Actinobacteriota	Actinobacteria	Micrococcales	Cellulomonadaceae	Actinotalea	0	0	0	0
Bacteroidota	Bacteroidia	Cytophagales	Hymenobacteraceae	Adhaeribacter	0	0	0	0
Actinobacteriota	Coriobacteriia	Coriobacteriales	Eggerthellaceae	Adlercreutzia	0	101	21	72
Verrucomicrobiota	Verrucomicrobiae	Pedosphaerales	Pedosphaeraceae	ADurb.Bin063-1	0	0	0	0
Actinobacteriota	Actinobacteria	Propionibacteriales	Nocardioidaceae	Aeromicrobium	0	0	0	62
Proteobacteria	Gammaproteobacteria	Enterobacterales	Aeromonadaceae	Aeromonas	342	309	24	0
Myxococcota	Polyangia	Polyangiales	Polyangiaceae	Aetherobacter	0	0	0	0
Proteobacteria	Alphaproteobacteria	Rhizobiales	Xanthobacteraceae	Afipia	0	19	0	40
Firmicutes	Clostridia	Lachnospirales	Lachnospiraceae	Agathobacter	263	204	277	342
Actinobacteriota	Actinobacteria	Micrococcales	Microbacteriaceae	Agromyces	0	0	68	0
Proteobacteria	Gammaproteobacteria	Xanthomonadales	Rhodanobacteraceae	Ahniella	165	146	64	34
Proteobacteria	Alphaproteobacteria	Rhizobiales	Rhizobiaceae	Ahrensia	0	0	0	0
Verrucomicrobiota	Verrucomicrobiae	Verrucomicrobiales	Akkermansiaceae	Akkermansia	101	101	0	29
Planctomycetota	Phycisphaerae	Phycisphaerales	Phycisphaeraceae	AKYG587	0	58	0	0
Proteobacteria	Gammaproteobacteria	Salinisphaerales	Algiphilaceae	Algiphilus	0	0	0	0
Bacteroidota	Bacteroidia	Cytophagales	Cyclobacteriaceae	Algoriphagus	0	0	0	0
Firmicutes	Bacilli	Alicyclobacillales	Alicyclobacillaceae	Alicyclobacillus	0	67	328	193
Proteobacteria	Alphaproteobacteria	Rhizobiales	Rhizobiaceae	Aliihoeflea	0	58	0	0
Bacteroidota	Bacteroidia	Bacteroidales	Rikenellaceae	Alistipes	0	0	0	0
Proteobacteria	Gammaproteobacteria	Salinisphaerales	Solimonadaceae	Alkanibacter	0	91	0	0
Actinobacteriota	Actinobacteria	Pseudonocardiales	Pseudonocardiaceae	Alloactinosynnema	0	0	0	0
Actinobacteriota	Actinobacteria	Micromonosporales	Micromonosporaceae	Allocatelliglobosispora	0	0	0	0
Bacteroidota	Bacteroidia	Bacteroidales	Prevotellaceae	Alloprevotella	0	0	0	0
Proteobacteria	Alphaproteobacteria	Rhizobiales	Rhizobiaceae	Allorhizobium-Neorhizobium-Pararhizobium-Rhizobium	645	524	603	753
Actinobacteriota	Actinobacteria	Streptomycetales	Streptomycetaceae	Allostreptomyces	0	0	0	0
Proteobacteria	Alphaproteobacteria	Rhizobiales	Beijerinckiaceae	alphaI cluster	0	0	0	0
Proteobacteria	Alphaproteobacteria	Sphingomonadales	Sphingomonadaceae	Altererythrobacter	76	58	0	0
Proteobacteria	Gammaproteobacteria	Enterobacterales	Alteromonadaceae	Alteromonas	0	0	0	66
Proteobacteria	Alphaproteobacteria	Rhodobacterales	Rhodobacteraceae	Amaricoccus	0	0	0	0
Proteobacteria	Alphaproteobacteria	Rhizobiales	Rhizobiaceae	Aminobacter	52	64	0	0
Firmicutes	Bacilli	Paenibacillales	Paenibacillaceae	Ammoniibacillus	0	0	0	0
Firmicutes	Bacilli	Paenibacillales	Paenibacillaceae	Ammoniphilus	0	77	0	84
Actinobacteriota	Actinobacteria	Pseudonocardiales	Pseudonocardiaceae	Amycolatopsis	0	0	0	0
Firmicutes	Clostridia	Oscillospirales	Hungateiclostridiaceae	Anaerobacterium	0	0	0	0
Firmicutes	Clostridia	Lachnospirales	Lachnospiraceae	Anaerocolumna	0	0	0	0
Chloroflexi	Anaerolineae	Anaerolineales	Anaerolineaceae	Anaerolinea	0	0	0	0
Myxococcota	Myxococcia	Myxococcales	Anaeromyxobacteraceae	Anaeromyxobacter	0	0	0	0
Firmicutes	Clostridia	Lachnospirales	Lachnospiraceae	Anaerosporobacter	0	0	0	0
Firmicutes	Negativicutes	Veillonellales-Selenomonadales	Sporomusaceae	Anaerosporomusa	0	0	0	0
Firmicutes	Clostridia	Lachnospirales	Lachnospiraceae	Anaerostipes	120	87	80	74
Firmicutes	Clostridia	Peptostreptococcales-Tissierellales	Anaerovoracaceae	Anaerovorax	0	0	0	0
Proteobacteria	Alphaproteobacteria	Rhizobiales	Rhizobiales Incertae Sedis	Anderseniella	84	0	66	0
Firmicutes	Bacilli	Aneurinibacillales	Aneurinibacillaceae	Aneurinibacillus	0	0	0	0
Proteobacteria	Gammaproteobacteria	Nitrosococcales	Nitrosococcaceae	AqS1	60	69	0	0
Proteobacteria	Gammaproteobacteria	Burkholderiales	Comamonadaceae	Aquabacterium	157	78	58	73
Bacteroidota	Bacteroidia	Flavobacteriales	Flavobacteriaceae	Aquibacter	202	0	61	0
Proteobacteria	Gammaproteobacteria	Diplorickettsiales	Diplorickettsiaceae	Aquicella	0	0	0	0
Bacteroidota	Bacteroidia	Flavobacteriales	Flavobacteriaceae	Aquimarina	8	0	0	0
Proteobacteria	Gammaproteobacteria	Xanthomonadales	Rhodanobacteraceae	Aquimonas	218	189	162	106
Planctomycetota	Planctomycetes	Isosphaerales	Isosphaeraceae	Aquisphaera	0	0	0	0
Bacteroidota	Bacteroidia	Chitinophagales	Chitinophagaceae	Arachidicoccus	77	0	0	46
Myxococcota	Myxococcia	Myxococcales	Myxococcaceae	Archangium	0	0	0	0
Bacteroidota	Bacteroidia	Sphingobacteriales	Sphingobacteriaceae	Arcticibacter	0	0	0	0
Bacteroidota	Bacteroidia	Flavobacteriales	Flavobacteriaceae	Arcticiflavibacter	0	0	0	0
Proteobacteria	Gammaproteobacteria	Xanthomonadales	Xanthomonadaceae	Arenimonas	0	0	0	0
Acidobacteriota	Blastocatellia	Blastocatellales	Blastocatellaceae	Aridibacter	0	0	0	72
Proteobacteria	Alphaproteobacteria	Rhizobiales	Devosiaceae	Arsenicitalea	0	43	0	0
Actinobacteriota	Actinobacteria	Micrococcales	Micrococcaceae	Arthrobacter	0	0	0	0
Cyanobacteria	Cyanobacteriia	Cyanobacteriales	Phormidiaceae	Arthrospira PCC-7345	0	0	71	0
Actinobacteriota	Actinobacteria	Micromonosporales	Micromonosporaceae	Asanoa	0	0	0	69
Proteobacteria	Alphaproteobacteria	Rhodobacterales	Rhodobacteraceae	Ascidiaceihabitans	38	0	0	75
Firmicutes	Bacilli	Erysipelotrichales	Erysipelatoclostridiaceae	Asteroleplasma	0	0	0	0
Proteobacteria	Alphaproteobacteria	Caulobacterales	Caulobacteraceae	Asticcacaulis	15	16	0	81
Actinobacteriota	Actinobacteria	Micrococcales	Microbacteriaceae	Aurantimicrobium	120	196	301	310
Bacteroidota	Bacteroidia	Chitinophagales	Chitinophagaceae	Aurantisolimonas	89	138	17	20
Bacteroidota	Bacteroidia	Flavobacteriales	Flavobacteriaceae	Aurantivirga	0	0	0	66
Bacteroidota	Bacteroidia	Flavobacteriales	Flavobacteriaceae	Aureimarina	0	0	0	0
Bacteroidota	Bacteroidia	Flavobacteriales	Flavobacteriaceae	Aureisphaera	0	0	0	0
Proteobacteria	Gammaproteobacteria	Burkholderiales	Comamonadaceae	Azohydromonas	0	0	0	0
Proteobacteria	Alphaproteobacteria	Azospirillales	Azospirillaceae	Azospirillum	92	44	0	0
Proteobacteria	Gammaproteobacteria	Pseudomonadales	Pseudomonadaceae	Azotobacter	31	0	0	0
Firmicutes	Bacilli	Bacillales	Bacillaceae	Bacillus	342	642	333	214
Bacteroidota	Bacteroidia	Bacteroidales	Rikenellaceae	Bact-08	0	81	0	0
Bacteroidota	Bacteroidia	Bacteroidales	Bacteroidaceae	Bacteroides	251	128	0	81
Bacteroidota	Bacteroidia	Bacteroidales	Barnesiellaceae	Barnesiella	84	0	0	0
Proteobacteria	Alphaproteobacteria	Rhizobiales	Rhizobiales Incertae Sedis	Bauldia	0	0	0	0
Proteobacteria	Gammaproteobacteria	Pseudomonadales	Spongiibacteraceae	BD1-7 clade	73	0	0	0
Bdellovibrionota	Bdellovibrionia	Bdellovibrionales	Bdellovibrionaceae	Bdellovibrio	78	98	124	118
Proteobacteria	Alphaproteobacteria	Acetobacterales	Acetobacteraceae	Belnapia	0	0	0	0
Actinobacteriota	Actinobacteria	Bifidobacteriales	Bifidobacteriaceae	Bifidobacterium	339	273	176	201
Proteobacteria	Gammaproteobacteria	Pseudomonadales	Pseudohongiellaceae	BIyi10	0	0	0	0
Acidobacteriota	Blastocatellia	Blastocatellales	Blastocatellaceae	Blastocatella	0	0	0	71
Actinobacteriota	Actinobacteria	Frankiales	Geodermatophilaceae	Blastococcus	126	48	0	64
Proteobacteria	Alphaproteobacteria	Sphingomonadales	Sphingomonadaceae	Blastomonas	80	67	0	0
Planctomycetota	Planctomycetes	Pirellulales	Pirellulaceae	Blastopirellula	0	143	89	0
Firmicutes	Clostridia	Lachnospirales	Lachnospiraceae	Blautia	956	705	763	893
Proteobacteria	Gammaproteobacteria	Burkholderiales	Alcaligenaceae	Bordetella	0	0	0	70
Proteobacteria	Alphaproteobacteria	Rhizobiales	Beijerinckiaceae	Bosea	289	308	100	78
Proteobacteria	Alphaproteobacteria	Rhizobiales	Xanthobacteraceae	Bradyrhizobium	297	319	229	166
Firmicutes	Bacilli	Brevibacillales	Brevibacillaceae	Brevibacillus	169	268	176	153
Verrucomicrobiota	Verrucomicrobiae	Verrucomicrobiales	Verrucomicrobiaceae	Brevifollis	0	72	0	0
Proteobacteria	Alphaproteobacteria	Caulobacterales	Caulobacteraceae	Brevundimonas	41	63	36	0
Proteobacteria	Alphaproteobacteria	Rhizobiales	Rhizobiaceae	Brucella	0	0	0	0
Acidobacteriota	Acidobacteriae	Bryobacterales	Bryobacteraceae	Bryobacter	0	25	67	94
Proteobacteria	Gammaproteobacteria	Burkholderiales	Burkholderiaceae	Burkholderia-Caballeronia-Paraburkholderia	871	1006	898	1183
Firmicutes	Clostridia	Oscillospirales	Butyricicoccaceae	Butyricicoccus	85	0	42	0
Planctomycetota	Planctomycetes	Pirellulales	Pirellulaceae	Bythopirellula	0	0	0	75
Proteobacteria	Gammaproteobacteria	Burkholderiales	Rhodocyclaceae	C39	491	898	33253	25403
Proteobacteria	Gammaproteobacteria	Burkholderiales	Comamonadaceae	Caenimonas	0	0	0	0
Firmicutes	Clostridia	Oscillospirales	Ruminococcaceae	CAG-352	252	132	99	224
Bacteroidota	Bacteroidia	Bacteroidales	Muribaculaceae	CAG-873	0	0	0	0
Firmicutes	Bacilli	Bacillales	Bacillaceae	Caldibacillus	0	0	76	0
Caldisericota	Caldisericia	Caldisericales	Caldisericaceae	Caldisericum	0	0	0	0
Calditrichota	Calditrichia	Calditrichales	Calditrichaceae	Caldithrix	0	0	0	0
Calditrichota	Calditrichia	Calditrichales	Calditrichaceae	Calorithrix	0	0	0	0
Actinobacteriota	Acidimicrobiia	Actinomarinales	Actinomarinaceae	Candidatus Actinomarina	70	0	0	0
Proteobacteria	Alphaproteobacteria	Tistrellales	Geminicoccaceae	Candidatus Alysiosphaera	0	33	0	0
Bacteroidota	Bacteroidia	Cytophagales	Amoebophilaceae	Candidatus Amoebophilus	0	0	0	65
Proteobacteria	Gammaproteobacteria	Gammaproteobacteria Incertae Sedis	Unknown Family	Candidatus Berkiella	0	0	0	0
Chloroflexi	Chloroflexia	Chloroflexales	Chloroflexaceae	Candidatus Chloroploca	0	0	0	0
Entotheonellaeota	Entotheonellia	Entotheonellales	Entotheonellaceae	Candidatus Entotheonella	0	0	0	0
Proteobacteria	Alphaproteobacteria	Holosporales	Holosporaceae	Candidatus Gortzia	21	0	186	147
Firmicutes	Bacilli	Entomoplasmatales	Entomoplasmatales Incertae Sedis	Candidatus Hepatoplasma	80	0	0	62
Proteobacteria	Alphaproteobacteria	Rickettsiales	Rickettsiaceae	Candidatus Megaira	0	0	76	74
Verrucomicrobiota	Chlamydiae	Chlamydiales	Parachlamydiaceae	Candidatus Metachlamydia	77	58	0	0
Crenarchaeota	Nitrososphaeria	Nitrososphaerales	Nitrososphaeraceae	Candidatus Nitrocosmicus	0	0	0	0
Verrucomicrobiota	Omnitrophia	Omnitrophales	Omnitrophaceae	Candidatus Omnitrophus	0	0	0	0
Patescibacteria	Parcubacteria	Paceibacterales	Paceibacteraceae	Candidatus Paceibacter	0	0	0	0
Proteobacteria	Alphaproteobacteria	Paracaedibacterales	Paracaedibacteraceae	Candidatus Paracaedibacter	0	0	0	0
Verrucomicrobiota	Chlamydiae	Chlamydiales	Parachlamydiaceae	Candidatus Protochlamydia	0	0	0	0
Proteobacteria	Alphaproteobacteria	Puniceispirillales	SAR116 clade	Candidatus Puniceispirillum	0	69	0	0
Verrucomicrobiota	Chlamydiae	Chlamydiales	Parachlamydiaceae	Candidatus Rubidus	0	0	0	0
Acidobacteriota	Acidobacteriae	Solibacterales	Solibacteraceae	Candidatus Solibacter	0	63	0	0
Proteobacteria	Gammaproteobacteria	Tenderiales	Tenderiaceae	Candidatus Tenderia	0	0	0	0
Verrucomicrobiota	Verrucomicrobiae	Chthoniobacterales	Chthoniobacteraceae	Candidatus Udaeobacter	0	70	0	144
Verrucomicrobiota	Verrucomicrobiae	Chthoniobacterales	Xiphinematobacteraceae	Candidatus Xiphinematobacter	0	121	62	0
Firmicutes	Clostridia	Oscillospirales	Ruminococcaceae	Caproiciproducens	0	0	0	0
Firmicutes	Bacilli	Lactobacillales	Carnobacteriaceae	Carnobacterium	0	0	0	0
Actinobacteriota	Actinobacteria	Micromonosporales	Micromonosporaceae	Catellatospora	0	0	0	0
Actinobacteriota	Actinobacteria	Micromonosporales	Micromonosporaceae	Catelliglobosispora	0	0	0	0
Firmicutes	Bacilli	Erysipelotrichales	Erysipelatoclostridiaceae	Catenibacterium	173	175	126	97
Proteobacteria	Alphaproteobacteria	Caulobacterales	Caulobacteraceae	Caulobacter	227	298	198	411
Proteobacteria	Alphaproteobacteria	Rhodobacterales	Rhodobacteraceae	Celeribacter	0	60	0	0
Actinobacteriota	Actinobacteria	Micrococcales	Cellulomonadaceae	Cellulomonas	0	58	0	0
Proteobacteria	Gammaproteobacteria	Pseudomonadales	Cellvibrionaceae	Cellvibrio	116	97	32	112
Verrucomicrobiota	Verrucomicrobiae	Opitutales	Opitutaceae	Cephaloticoccus	0	0	0	0
Proteobacteria	Alphaproteobacteria	Rhodobacterales	Rhodobacteraceae	Cereibacter	85	0	0	0
Proteobacteria	Alphaproteobacteria	Rhizobiales	Beijerinckiaceae	Chelatococcus	0	0	0	0
Bacteroidota	Bacteroidia	Chitinophagales	Chitinophagaceae	Chitinophaga	0	0	0	0
Chloroflexi	Chloroflexia	Chloroflexales	Chloroflexaceae	Chloronema	76	64	0	0
Firmicutes	Clostridia	Christensenellales	Christensenellaceae	Christensenellaceae R-7 group	139	0	0	110
Bacteroidota	Bacteroidia	Flavobacteriales	Weeksellaceae	Chryseobacterium	112	138	71	0
Bacteroidota	Bacteroidia	Cytophagales	Microscillaceae	Chryseolinea	0	64	0	0
Verrucomicrobiota	Verrucomicrobiae	Chthoniobacterales	Chthoniobacteraceae	Chthoniobacter	75	72	0	0
Armatimonadota	Chthonomonadetes	Chthonomonadales	Chthonomonadaceae	Chthonomonas	0	29	0	0
Desulfobacterota	Desulfuromonadia	Geobacterales	Geobacteraceae	Citrifermentans	0	0	0	0
Proteobacteria	Gammaproteobacteria	Enterobacterales	Enterobacteriaceae	Citrobacter	241	225	0	0
Actinobacteriota	Acidimicrobiia	Microtrichales	Ilumatobacteraceae	CL500-29 marine group	0	0	0	0
Planctomycetota	Phycisphaerae	Phycisphaerales	Phycisphaeraceae	CL500-3	0	0	0	0
Proteobacteria	Alphaproteobacteria	SAR11 clade	Clade I	Clade Ia	187	125	221	232
Proteobacteria	Alphaproteobacteria	SAR11 clade	Clade I	Clade Ib	0	0	39	125
Bacteroidota	Bacteroidia	Flavobacteriales	Weeksellaceae	Cloacibacterium	437	509	30	0
Firmicutes	Clostridia	Clostridiales	Clostridiaceae	Clostridium sensu stricto 1	458	571	62	149
Firmicutes	Clostridia	Clostridiales	Clostridiaceae	Clostridium sensu stricto 10	0	0	0	0
Firmicutes	Clostridia	Clostridiales	Clostridiaceae	Clostridium sensu stricto 11	0	0	0	0
Firmicutes	Clostridia	Clostridiales	Clostridiaceae	Clostridium sensu stricto 12	0	0	0	0
Firmicutes	Clostridia	Clostridiales	Clostridiaceae	Clostridium sensu stricto 13	0	0	0	0
Firmicutes	Clostridia	Clostridiales	Clostridiaceae	Clostridium sensu stricto 19	0	0	0	0
Firmicutes	Clostridia	Clostridiales	Clostridiaceae	Clostridium sensu stricto 3	0	0	0	0
Firmicutes	Clostridia	Clostridiales	Clostridiaceae	Clostridium sensu stricto 5	0	0	0	0
Firmicutes	Clostridia	Clostridiales	Clostridiaceae	Clostridium sensu stricto 8	0	0	0	0
Firmicutes	Clostridia	Clostridiales	Clostridiaceae	Clostridium sensu stricto 9	0	0	0	0
Proteobacteria	Gammaproteobacteria	Nitrosococcales	Nitrosococcaceae	Cm1-21	61	0	0	0
Proteobacteria	Alphaproteobacteria	Rhizobiales	Rhizobiaceae	Cohaesibacter	0	0	0	86
Firmicutes	Bacilli	Paenibacillales	Paenibacillaceae	Cohnella	114	273	72	186
Actinobacteriota	Coriobacteriia	Coriobacteriales	Coriobacteriaceae	Collinsella	245	208	131	108
Proteobacteria	Gammaproteobacteria	Enterobacterales	Colwelliaceae	Colwellia	0	68	0	0
Proteobacteria	Gammaproteobacteria	Burkholderiales	Comamonadaceae	Comamonas	277	186	0	0
Actinobacteriota	Thermoleophilia	Solirubrobacterales	Solirubrobacteraceae	Conexibacter	0	0	0	0
Bacteroidota	Bacteroidia	Bacteroidales	Barnesiellaceae	Coprobacter	0	0	0	0
Firmicutes	Clostridia	Lachnospirales	Lachnospiraceae	Coprococcus	346	63	21	60
Actinobacteriota	Actinobacteria	Corynebacteriales	Corynebacteriaceae	Corynebacterium	0	95	0	40
Proteobacteria	Gammaproteobacteria	Coxiellales	Coxiellaceae	Coxiella	0	0	97	96
Proteobacteria	Alphaproteobacteria	Acetobacterales	Acetobacteraceae	Craurococcus-Caldovatus	0	0	0	0
Proteobacteria	Gammaproteobacteria	Burkholderiales	Burkholderiaceae	Cupriavidus	0	0	0	0
Proteobacteria	Gammaproteobacteria	Burkholderiales	Comamonadaceae	Curvibacter	0	0	0	0
Actinobacteriota	Actinobacteria	Propionibacteriales	Propionibacteriaceae	Cutibacterium	114	128	140	165
Cyanobacteria	Cyanobacteriia	Synechococcales	Cyanobiaceae	Cyanobium PCC-6307	0	0	0	0
Cyanobacteria	Cyanobacteriia	Cyanobacteriales	Nostocaceae	Cylindrospermum PCC-7417	0	0	0	0
Myxococcota	Myxococcia	Myxococcales	Myxococcaceae	Cystobacter	0	0	0	0
Actinobacteriota	Actinobacteria	Micromonosporales	Micromonosporaceae	Dactylosporangium	0	0	0	0
Proteobacteria	Gammaproteobacteria	Burkholderiales	Rhodocyclaceae	Dechloromonas	106	66	0	0
Proteobacteria	Alphaproteobacteria	Defluviicoccales	Defluviicoccaceae	Defluviicoccus	0	0	0	0
Proteobacteria	Gammaproteobacteria	Burkholderiales	Comamonadaceae	Delftia	83	0	0	0
Firmicutes	Bacilli	Lactobacillales	Carnobacteriaceae	Desemzia	0	0	0	0
Proteobacteria	Alphaproteobacteria	Azospirillales	Azospirillaceae	Desertibacter	0	0	0	0
Cyanobacteria	Cyanobacteriia	Cyanobacteriales	Nostocaceae	Desmonostoc PCC-7422	0	0	0	0
Desulfobacterota	Desulfobacteria	Desulfatiglandales	Desulfatiglandaceae	Desulfatiglans	0	0	0	93
Desulfobacterota	Desulfobulbia	Desulfobulbales	Desulfobulbaceae	Desulfobulbus	59	67	0	0
Desulfobacterota	Desulfovibrionia	Desulfovibrionales	Desulfomicrobiaceae	Desulfomicrobium	71	0	73	0
Desulfobacterota	Desulfobulbia	Desulfobulbales	Desulfocapsaceae	Desulfopila	56	19	0	25
Desulfobacterota	Desulfobulbia	Desulfobulbales	Desulfocapsaceae	Desulforhopalus	0	0	66	0
Desulfobacterota	Desulfobacteria	Desulfobacterales	Desulfosarcinaceae	Desulfosarcina	0	0	0	70
Firmicutes	Desulfitobacteriia	Desulfitobacteriales	Desulfitobacteriaceae	Desulfosporosinus	0	0	0	0
Firmicutes	Desulfotomaculia	Desulfotomaculales	Desulfotomaculaceae	Desulfotomaculum	0	0	0	0
Desulfobacterota	Desulfovibrionia	Desulfovibrionales	Desulfovibrionaceae	Desulfovibrio	0	0	0	0
Desulfobacterota	Desulfuromonadia	Desulfuromonadales	Geopsychrobacteraceae	Desulfuromusa	0	0	0	0
Verrucomicrobiota	Verrucomicrobiae	Pedosphaerales	Pedosphaeraceae	DEV008	0	0	0	0
Proteobacteria	Alphaproteobacteria	Rhizobiales	Devosiaceae	Devosia	198	165	111	235
Firmicutes	Negativicutes	Veillonellales-Selenomonadales	Veillonellaceae	Dialister	218	149	0	153
Proteobacteria	Gammaproteobacteria	Burkholderiales	Comamonadaceae	Diaphorobacter	73	0	0	0
Bacteroidota	Bacteroidia	Chitinophagales	Chitinophagaceae	Dinghuibacter	0	0	0	0
Proteobacteria	Gammaproteobacteria	Diplorickettsiales	Diplorickettsiaceae	Diplorickettsia	0	0	70	0
Proteobacteria	Gammaproteobacteria	Xanthomonadales	Rhodanobacteraceae	Dokdonella	0	0	0	0
Firmicutes	Bacilli	Bacillales	Planococcaceae	Domibacillus	0	0	0	0
Proteobacteria	Alphaproteobacteria	Dongiales	Dongiaceae	Dongia	0	31	23	0
Firmicutes	Clostridia	Lachnospirales	Lachnospiraceae	Dorea	343	391	227	225
Proteobacteria	Gammaproteobacteria	Burkholderiales	Oxalobacteraceae	Duganella	0	0	0	0
Bacteroidota	Bacteroidia	Cytophagales	Spirosomaceae	Dyadobacter	0	0	0	0
Proteobacteria	Gammaproteobacteria	Xanthomonadales	Rhodanobacteraceae	Dyella	0	60	0	0
Bacteroidota	Bacteroidia	Bacteroidales	Dysgonomonadaceae	Dysgonomonas	0	0	78	0
Bacteroidota	Bacteroidia	Chitinophagales	Chitinophagaceae	Edaphobaculum	0	89	0	69
Firmicutes	Bacilli	Alicyclobacillales	Alicyclobacillaceae	Effusibacillus	0	65	80	0
Bacteroidota	Bacteroidia	Cytophagales	Cyclobacteriaceae	Ekhidna	44	0	0	0
Verrucomicrobiota	Verrucomicrobiae	Pedosphaerales	Pedosphaeraceae	Ellin516	0	0	0	0
Verrucomicrobiota	Verrucomicrobiae	Pedosphaerales	Pedosphaeraceae	Ellin517	76	0	0	0
Proteobacteria	Alphaproteobacteria	Sphingomonadales	Sphingomonadaceae	Ellin6055	0	126	0	0
Proteobacteria	Gammaproteobacteria	Burkholderiales	Nitrosomonadaceae	Ellin6067	0	110	0	76
Proteobacteria	Alphaproteobacteria	Rhizobiales	Rhizobiaceae	Ensifer	0	0	0	0
Proteobacteria	Gammaproteobacteria	Enterobacterales	Enterobacteriaceae	Enterobacter	1611	1878	603	661
Firmicutes	Bacilli	Lactobacillales	Enterococcaceae	Enterococcus	0	73	0	0
Firmicutes	Clostridia	Lachnospirales	Lachnospiraceae	Epulopiscium	0	0	0	0
Firmicutes	Bacilli	Erysipelotrichales	Erysipelotrichaceae	Erysipelothrix	116	171	0	14
Firmicutes	Bacilli	Erysipelotrichales	Erysipelatoclostridiaceae	Erysipelotrichaceae UCG-003	67	24	0	0
Proteobacteria	Gammaproteobacteria	Enterobacterales	Enterobacteriaceae	Escherichia-Shigella	49	19	34	0
Bacteroidota	Bacteroidia	Flavobacteriales	Flavobacteriaceae	Eudoraea	0	0	0	0
Firmicutes	Bacilli	Exiguobacterales	Exiguobacteraceae	Exiguobacterium	232	171	0	23
Bacteroidota	Bacteroidia	Cytophagales	Cyclobacteriaceae	Fabibacter	0	0	0	0
Firmicutes	Clostridia	Oscillospirales	Ruminococcaceae	Faecalibacterium	388	284	64	296
Firmicutes	Bacilli	Bacillales	Bacillaceae	Falsibacillus	0	0	0	25
Proteobacteria	Gammaproteobacteria	Francisellales	Francisellaceae	Fangia	0	75	0	0
Proteobacteria	Gammaproteobacteria	Burkholderiales	Rhodocyclaceae	Ferribacterium	0	0	0	0
Bacteroidota	Bacteroidia	Chitinophagales	Chitinophagaceae	Ferruginibacter	0	0	0	0
Chloroflexi	Chloroflexia	Chloroflexales	Chloroflexaceae	FFCH7168	0	0	0	0
Firmicutes	Bacilli	Bacillales	Bacillaceae	Fictibacillus	0	0	0	123
Proteobacteria	Alphaproteobacteria	Rhizobiales	Hyphomicrobiaceae	Filomicrobium	0	57	0	0
Planctomycetota	Planctomycetes	Gemmatales	Gemmataceae	Fimbriiglobus	146	83	0	0
Bacteroidota	Bacteroidia	Chitinophagales	Chitinophagaceae	Flaviaesturariibacter	0	0	0	0
Bacteroidota	Bacteroidia	Chitinophagales	Chitinophagaceae	Flavihumibacter	135	76	0	0
Proteobacteria	Alphaproteobacteria	Rhodobacterales	Rhodobacteraceae	Flavimaricola	76	67	37	0
Bacteroidota	Bacteroidia	Flavobacteriales	Flavobacteriaceae	Flavirhabdus	0	0	0	0
Bacteroidota	Bacteroidia	Chitinophagales	Chitinophagaceae	Flavisolibacter	0	26	0	0
Bacteroidota	Bacteroidia	Chitinophagales	Chitinophagaceae	Flavitalea	0	0	0	0
Bacteroidota	Bacteroidia	Flavobacteriales	Flavobacteriaceae	Flavobacterium	271	270	238	213
Firmicutes	Clostridia	Oscillospirales	Oscillospiraceae	Flavonifractor	0	70	0	72
Bacteroidota	Bacteroidia	Flavobacteriales	Crocinitomicaceae	Fluviicola	0	0	0	62
Firmicutes	Clostridia	Clostridiales	Caloramatoraceae	Fonticella	0	0	0	0
Proteobacteria	Gammaproteobacteria	Salinisphaerales	Solimonadaceae	Fontimonas	0	0	0	0
Bacteroidota	Bacteroidia	Flavobacteriales	Flavobacteriaceae	Formosa	0	0	0	0
Actinobacteriota	Actinobacteria	Frankiales	Frankiaceae	Frankia	0	0	0	0
Proteobacteria	Gammaproteobacteria	Enterobacterales	Orbaceae	Frischella	84	0	0	0
Proteobacteria	Gammaproteobacteria	Nitrosococcales	Nitrosococcaceae	FS142-36B-02	0	139	0	0
Firmicutes	Clostridia	Peptostreptococcales-Tissierellales	Fusibacteraceae	Fusibacter	0	0	90	58
Firmicutes	Clostridia	Lachnospirales	Lachnospiraceae	Fusicatenibacter	174	275	199	163
Fusobacteriota	Fusobacteriia	Fusobacteriales	Fusobacteriaceae	Fusobacterium	0	0	0	0
Verrucomicrobiota	Chlamydiae	Chlamydiales	Simkaniaceae	Ga0074140	0	0	69	0
Actinobacteriota	Thermoleophilia	Gaiellales	Gaiellaceae	Gaiella	143	127	0	192
Actinobacteriota	Actinobacteria	Micrococcales	Microbacteriaceae	Galbitalea	0	28	0	0
Cyanobacteria	Cyanobacteriia	Geitlerinematales	Geitlerinemataceae	Geitlerinema	0	0	0	0
Proteobacteria	Alphaproteobacteria	Tistrellales	Geminicoccaceae	Geminicoccus	0	49	0	0
Cyanobacteria	Cyanobacteriia	Cyanobacteriales	Cyanobacteriaceae	Geminocystis PCC-6308	0	102	0	0
Planctomycetota	Planctomycetes	Gemmatales	Gemmataceae	Gemmata	207	435	0	146
Gemmatimonadota	Gemmatimonadetes	Gemmatimonadales	Gemmatimonadaceae	Gemmatimonas	63	73	0	0
Proteobacteria	Alphaproteobacteria	Rhodobacterales	Rhodobacteraceae	Gemmobacter	910	872	238	222
Firmicutes	Bacilli	Bacillales	Bacillaceae	Geobacillus	360	192	111	230
Actinobacteriota	Actinobacteria	Frankiales	Geodermatophilaceae	Geodermatophilus	0	8	0	0
Actinobacteriota	Actinobacteria	Micrococcales	Bogoriellaceae	Georgenia	0	0	0	0
Proteobacteria	Gammaproteobacteria	Burkholderiales	Rhodocyclaceae	Georgfuchsia	0	0	0	0
Proteobacteria	Gammaproteobacteria	Enterobacterales	Alteromonadaceae	Glaciecola	0	0	0	0
Actinobacteriota	Actinobacteria	Glycomycetales	Glycomycetaceae	Glycomyces	0	0	0	0
Bacteroidota	Bacteroidia	Flavobacteriales	Flavobacteriaceae	Gramella	0	0	0	61
Acidobacteriota	Acidobacteriae	Acidobacteriales	Acidobacteriaceae (Subgroup 1)	Granulicella	0	84	78	0
Myxococcota	Polyangia	Haliangiales	Haliangiaceae	Haliangium	0	0	0	0
Proteobacteria	Gammaproteobacteria	Pseudomonadales	Halieaceae	Halioglobus	0	59	0	0
Bacteroidota	Bacteroidia	Chitinophagales	Saprospiraceae	Haliscomenobacter	51	23	0	0
Firmicutes	Bacilli	Bacillales	Bacillaceae	Halobacillus	0	0	0	0
Halanaerobiaeota	Halanaerobiia	Halanaerobiales	Halanaerobiaceae	Halocella	0	0	0	0
Proteobacteria	Alphaproteobacteria	Rhodobacterales	Rhodobacteraceae	Halovulum	0	0	0	0
Bacteroidota	Bacteroidia	Cytophagales	Microscillaceae	Hassallia	28	0	0	0
Proteobacteria	Gammaproteobacteria	Burkholderiales	Oxalobacteraceae	Herbaspirillum	44	156	0	0
Actinobacteriota	Actinobacteria	Streptosporangiales	Streptosporangiaceae	Herbidospora	0	0	59	0
Firmicutes	Clostridia	Lachnospirales	Lachnospiraceae	Herbinix	68	0	0	59
Chloroflexi	Chloroflexia	Chloroflexales	Herpetosiphonaceae	Herpetosiphon	77	66	0	49
Proteobacteria	Alphaproteobacteria	Rhodobacterales	Rhodobacteraceae	HIMB11	0	0	0	0
Proteobacteria	Alphaproteobacteria	Caulobacterales	Hyphomonadaceae	Hirschia	0	0	0	76
Proteobacteria	Alphaproteobacteria	Rhizobiales	Rhizobiaceae	Hoeflea	0	0	0	0
Firmicutes	Bacilli	Erysipelotrichales	Erysipelotrichaceae	Holdemanella	76	80	119	62
Proteobacteria	Gammaproteobacteria	Burkholderiales	Comamonadaceae	Hydrogenophaga	708	987	1035	861
Proteobacteria	Alphaproteobacteria	Rhizobiales	Hyphomicrobiaceae	Hyphomicrobium	0	134	25	0
Proteobacteria	Alphaproteobacteria	Caulobacterales	Hyphomonadaceae	Hyphomonas	67	0	0	0
Actinobacteriota	Acidimicrobiia	Microtrichales	Iamiaceae	Iamia	55	32	0	72
Proteobacteria	Gammaproteobacteria	Burkholderiales	Comamonadaceae	Ideonella	101	71	0	0
Bacteroidota	Ignavibacteria	Ignavibacteriales	Ignavibacteriaceae	Ignavibacterium	0	0	0	0
Bacteroidota	Ignavibacteria	Ignavibacteriales	Melioribacteraceae	IheB3-7	0	0	0	0
Actinobacteriota	Acidimicrobiia	Microtrichales	Ilumatobacteraceae	Ilumatobacter	117	223	79	88
Verrucomicrobiota	Verrucomicrobiae	Opitutales	Opitutaceae	IMCC26134	0	0	0	0
Actinobacteriota	Acidimicrobiia	Microtrichales	Microtrichaceae	IMCC26207	0	0	0	0
Firmicutes	Clostridia	Oscillospirales	Ethanoligenenaceae	Incertae Sedis	0	88	0	0
Proteobacteria	Gammaproteobacteria	Enterobacterales	Morganellaceae	Incertae Sedis	0	0	0	64
Proteobacteria	Alphaproteobacteria	Azospirillales	Inquilinaceae	Inquilinus	0	0	0	0
Actinobacteriota	Actinobacteria	Micrococcales	Intrasporangiaceae	Intrasporangium	0	0	0	0
Proteobacteria	Gammaproteobacteria	Burkholderiales	Nitrosomonadaceae	IS-44	0	91	0	0
Proteobacteria	Alphaproteobacteria	Rhodobacterales	Rhodobacteraceae	Jannaschia	0	61	0	0
Actinobacteriota	Actinobacteria	Frankiales	Frankiaceae	Jatrophihabitans	0	0	0	0
Actinobacteriota	Thermoleophilia	Solirubrobacterales	Solirubrobacteraceae	JCM 18997	0	0	0	0
Calditrichota	Calditrichia	Calditrichales	Calditrichaceae	JdFR-76	0	0	0	51
Acidobacteriota	Blastocatellia	Blastocatellales	Blastocatellaceae	JGI 0001001-H03	0	0	0	0
Proteobacteria	Alphaproteobacteria	Rhizobiales	Kaistiaceae	Kaistia	65	71	0	116
Myxococcota	Myxococcia	Myxococcales	Myxococcaceae	KD3-10	0	0	0	0
Proteobacteria	Gammaproteobacteria	Pseudomonadales	Alcanivoracaceae	Ketobacter	0	0	0	0
Actinobacteriota	Actinobacteria	Kineosporiales	Kineosporiaceae	Kineosporia	0	0	0	0
Proteobacteria	Gammaproteobacteria	Enterobacterales	Enterobacteriaceae	Klebsiella	27	8	56	58
Actinobacteriota	Actinobacteria	Micrococcales	Intrasporangiaceae	Knoellia	0	0	0	0
Actinobacteriota	Actinobacteria	Micrococcales	Micrococcaceae	Kocuria	0	0	0	0
Proteobacteria	Gammaproteobacteria	Enterobacterales	Enterobacteriaceae	Kosakonia	167	248	252	297
Actinobacteriota	Actinobacteria	Propionibacteriales	Nocardioidaceae	Kribbella	0	53	0	52
Firmicutes	Bacilli	Kyrpidiales	Kyrpidiaceae	Kyrpidia	0	58	0	0
Myxococcota	Polyangia	Polyangiales	Polyangiaceae	Labilithrix	0	0	0	0
Proteobacteria	Alphaproteobacteria	Rhizobiales	Stappiaceae	Labrenzia	0	0	23	0
Proteobacteria	Alphaproteobacteria	Rhizobiales	Labraceae	Labrys	0	0	0	59
Firmicutes	Clostridia	Lachnospirales	Lachnospiraceae	Lachnoclostridium	0	0	0	0
Firmicutes	Clostridia	Lachnospirales	Lachnospiraceae	Lachnospiraceae ND3007 group	0	0	0	20
Firmicutes	Clostridia	Lachnospirales	Lachnospiraceae	Lachnospiraceae NK4A136 group	0	70	0	0
Firmicutes	Clostridia	Lachnospirales	Lachnospiraceae	Lachnospiraceae UCG-003	0	0	0	0
Firmicutes	Clostridia	Lachnospirales	Lachnospiraceae	Lachnospiraceae UCG-010	0	0	0	0
Bacteroidota	Bacteroidia	Chitinophagales	Chitinophagaceae	Lacibacter	0	16	60	0
Firmicutes	Bacilli	Lactobacillales	Lactobacillaceae	Lactobacillus	0	302	0	0
Firmicutes	Bacilli	Lactobacillales	Streptococcaceae	Lactococcus	0	59	0	0
Verrucomicrobiota	Verrucomicrobiae	Opitutales	Opitutaceae	Lacunisphaera	0	0	0	0
Actinobacteriota	Actinobacteria	Micrococcales	Intrasporangiaceae	Lapillicoccus	0	0	0	0
Bacteroidota	Bacteroidia	Cytophagales	Spirosomaceae	Larkinella	0	0	0	0
Proteobacteria	Gammaproteobacteria	Burkholderiales	Burkholderiaceae	Lautropia	0	0	0	0
Actinobacteriota	Actinobacteria	Corynebacteriales	Corynebacteriaceae	Lawsonella	105	0	0	0
Actinobacteriota	Actinobacteria	Pseudonocardiales	Pseudonocardiaceae	Lechevalieria	71	0	0	0
Proteobacteria	Gammaproteobacteria	Legionellales	Legionellaceae	Legionella	235	595	1556	1454
Actinobacteriota	Actinobacteria	Micrococcales	Microbacteriaceae	Leifsonia	348	473	319	343
Proteobacteria	Gammaproteobacteria	Enterobacterales	Enterobacteriaceae	Lelliottia	140	129	9	0
Proteobacteria	Alphaproteobacteria	Rhizobiales	Rhizobiaceae	Lentilitoribacter	0	0	0	0
Verrucomicrobiota	Verrucomicrobiae	Opitutales	Puniceicoccaceae	Lentimonas	0	68	0	60
Cyanobacteria	Cyanobacteriia	Leptolyngbyales	Leptolyngbyaceae	Leptolyngbya ANT.L52.2	0	0	0	0
Cyanobacteria	Cyanobacteriia	Oxyphotobacteria Incertae Sedis	Unknown Family	Leptolyngbya EcFYyyy-00	0	0	0	0
Proteobacteria	Gammaproteobacteria	Burkholderiales	Comamonadaceae	Leptothrix	0	0	0	0
Actinobacteriota	Actinobacteria	Micrococcales	Microbacteriaceae	Leucobacter	65	188	78	46
Firmicutes	Bacilli	Lactobacillales	Lactobacillaceae	Levilactobacillus	45	90	0	0
Bacteroidota	Bacteroidia	Chitinophagales	Saprospiraceae	Lewinella	138	56	39	63
Proteobacteria	Alphaproteobacteria	Rhodobacterales	Rhodobacteraceae	Limibaculum	0	0	0	0
Proteobacteria	Alphaproteobacteria	Rhodobacterales	Rhodobacteraceae	Limimaricola	66	0	0	0
Proteobacteria	Gammaproteobacteria	Burkholderiales	Burkholderiaceae	Limnobacter	0	0	0	0
Chloroflexi	Anaerolineae	Caldilineales	Caldilineaceae	Litorilinea	0	35	0	0
Firmicutes	Bacilli	Lactobacillales	Lactobacillaceae	Loigolactobacillus	0	77	0	0
Gemmatimonadota	Longimicrobia	Longimicrobiales	Longimicrobiaceae	Longimicrobium	0	0	0	0
Nitrospinota	Nitrospinia	Nitrospinales	Nitrospinaceae	LS-NOB	0	69	0	0
Actinobacteriota	Actinobacteria	Micromonosporales	Micromonosporaceae	Luedemannella	89	62	0	0
Proteobacteria	Gammaproteobacteria	Pseudomonadales	Halieaceae	Luminiphilus	0	0	0	0
Proteobacteria	Gammaproteobacteria	Xanthomonadales	Rhodanobacteraceae	Luteibacter	0	31	58	0
Proteobacteria	Gammaproteobacteria	Xanthomonadales	Xanthomonadaceae	Luteimonas	0	50	0	0
Acidobacteriota	Vicinamibacteria	Vicinamibacterales	Vicinamibacteraceae	Luteitalea	68	14	0	0
Verrucomicrobiota	Verrucomicrobiae	Verrucomicrobiales	Rubritaleaceae	Luteolibacter	98	66	0	51
Bacteroidota	Bacteroidia	Flavobacteriales	Flavobacteriaceae	Lutibacter	0	0	0	0
Bacteroidota	Bacteroidia	Flavobacteriales	Flavobacteriaceae	Lutimonas	0	0	0	0
Firmicutes	Bacilli	Bacillales	Planococcaceae	Lysinibacillus	0	0	0	0
Actinobacteriota	Actinobacteria	Micrococcales	Demequinaceae	Lysinimicrobium	113	40	0	0
Actinobacteriota	Actinobacteria	Micrococcales	Microbacteriaceae	Lysinimonas	0	0	0	0
Proteobacteria	Gammaproteobacteria	Xanthomonadales	Xanthomonadaceae	Lysobacter	175	107	76	0
Bacteroidota	Bacteroidia	Bacteroidales	Tannerellaceae	Macellibacteroides	143	73	0	0
Proteobacteria	Alphaproteobacteria	Rhodospirillales	Magnetospiraceae	Magnetospira	0	0	0	0
Bacteroidota	Bacteroidia	Flavobacteriales	Flavobacteriaceae	Maribacter	41	62	0	17
Proteobacteria	Gammaproteobacteria	Pseudomonadales	Cellvibrionaceae	Marinagarivorans	0	0	0	0
Proteobacteria	Alphaproteobacteria	Caulobacterales	Parvularculaceae	Marinicaulis	77	58	0	0
Proteobacteria	Gammaproteobacteria	Gammaproteobacteria Incertae Sedis	Unknown Family	Marinicella	0	0	0	0
Proteobacteria	Gammaproteobacteria	Pseudomonadales	Nitrincolaceae	Marinobacterium	0	0	0	0
Proteobacteria	Zetaproteobacteria	Mariprofundales	Mariprofundaceae	Mariprofundus	265	322	207	276
Proteobacteria	Alphaproteobacteria	Rhodobacterales	Rhodobacteraceae	Maritimibacter	77	0	0	0
Bacteroidota	Bacteroidia	Flavobacteriales	Flavobacteriaceae	Maritimimonas	29	75	0	0
Actinobacteriota	Actinobacteria	Propionibacteriales	Nocardioidaceae	Marmoricola	0	0	0	58
Proteobacteria	Gammaproteobacteria	Burkholderiales	Oxalobacteraceae	Massilia	2842	4196	2904	3817
Verrucomicrobiota	Verrucomicrobiae	Opitutales	Puniceicoccaceae	MB11C04 marine group	0	68	0	0
Firmicutes	Negativicutes	Veillonellales-Selenomonadales	Veillonellaceae	Megasphaera	59	51	0	54
Proteobacteria	Alphaproteobacteria	Rhizobiales	Rhizobiaceae	Mesorhizobium	0	0	0	0
Halobacterota	Methanosarcinia	Methanosarciniales	Methanosarcinaceae	Methanolobus	0	0	0	0
Halobacterota	Methanosarcinia	Methanosarciniales	Methanosarcinaceae	Methanosarcina	0	0	0	0
Proteobacteria	Gammaproteobacteria	Burkholderiales	Comamonadaceae	Methylibium	0	21	0	0
Proteobacteria	Gammaproteobacteria	Burkholderiales	Methylophilaceae	Methylobacillus	0	0	0	0
Proteobacteria	Alphaproteobacteria	Rhizobiales	Beijerinckiaceae	Methylobacterium-Methylorubrum	272	127	0	0
Proteobacteria	Alphaproteobacteria	Rhizobiales	Beijerinckiaceae	Methylocystis	0	0	0	0
Proteobacteria	Gammaproteobacteria	Burkholderiales	Methylophilaceae	Methylophilus	0	0	0	0
Proteobacteria	Gammaproteobacteria	Burkholderiales	Methylophilaceae	Methylotenera	0	78	0	0
Proteobacteria	Gammaproteobacteria	Burkholderiales	Rhodocyclaceae	Methyloversatilis	107	0	0	0
Actinobacteriota	Actinobacteria	Micrococcales	Microbacteriaceae	Microbacterium	0	25	0	0
Actinobacteriota	Actinobacteria	Micrococcales	Micrococcaceae	Micrococcus	48	0	0	46
Cyanobacteria	Cyanobacteriia	Cyanobacteriales	Coleofasciculaceae	Microcoleus PCC-7113	0	0	0	0
Actinobacteriota	Actinobacteria	Propionibacteriales	Propionibacteriaceae	Microlunatus	0	0	76	0
Actinobacteriota	Actinobacteria	Micromonosporales	Micromonosporaceae	Micromonospora	0	0	0	0
Actinobacteriota	Actinobacteria	Micrococcales	Microbacteriaceae	Microterricola	0	0	0	0
Proteobacteria	Alphaproteobacteria	Rhizobiales	Beijerinckiaceae	Microvirga	40	126	0	0
Proteobacteria	Gammaproteobacteria	Burkholderiales	Comamonadaceae	Mitsuaria	0	0	0	0
Methylomirabilota	Methylomirabilia	Methylomirabilales	Methylomirabilaceae	MIZ17	0	0	0	0
Proteobacteria	Gammaproteobacteria	Burkholderiales	Nitrosomonadaceae	mle1-7	0	24	0	0
Proteobacteria	Gammaproteobacteria	Burkholderiales	Methylophilaceae	MM2	0	26	0	0
Proteobacteria	Gammaproteobacteria	Burkholderiales	Nitrosomonadaceae	MND1	63	326	0	67
Firmicutes	Clostridia	Lachnospirales	Lachnospiraceae	Mobilitalea	0	0	0	0
Actinobacteriota	Actinobacteria	Frankiales	Geodermatophilaceae	Modestobacter	0	0	0	0
Firmicutes	Clostridia	Monoglobales	Monoglobaceae	Monoglobus	54	25	0	0
Proteobacteria	Gammaproteobacteria	Nitrosococcales	Nitrosococcaceae	MSB-1D1	0	0	0	153
Bacteroidota	Bacteroidia	Sphingobacteriales	Sphingobacteriaceae	Mucilaginibacter	0	0	0	0
Bacteroidota	Bacteroidia	Flavobacteriales	Flavobacteriaceae	Muricauda	60	0	0	0
Actinobacteriota	Actinobacteria	Micrococcales	Microbacteriaceae	Mycetocola	0	0	0	0
Actinobacteriota	Actinobacteria	Corynebacteriales	Mycobacteriaceae	Mycobacterium	0	182	65	84
Proteobacteria	Alphaproteobacteria	Rhizobiales	Rhizobiaceae	Mycoplana	39	0	0	0
Myxococcota	Myxococcia	Myxococcales	Myxococcaceae	Myxococcus	0	0	0	0
Firmicutes	Clostridia	Oscillospirales	[Eubacterium] coprostanoligenes group	NA	155	63	59	44
Verrucomicrobiota	Verrucomicrobiae	Chthoniobacterales	01D2Z36	NA	0	0	0	0
Proteobacteria	Gammaproteobacteria	Pseudomonadales	211ds20	NA	0	0	0	0
Bacteroidota	Bacteroidia	Chitinophagales	37-13	NA	0	79	0	0
Actinobacteriota	Thermoleophilia	Solirubrobacterales	67-14	NA	77	147	0	54
Proteobacteria	Alphaproteobacteria	Rhizobiales	A0839	NA	0	0	0	0
Proteobacteria	Gammaproteobacteria	Burkholderiales	A21b	NA	0	0	0	0
Chloroflexi	Anaerolineae	SBR1031	A4b	NA	32	32	0	0
Proteobacteria	Alphaproteobacteria	Acetobacterales	Acetobacteraceae	NA	0	0	0	0
Firmicutes	Negativicutes	Acidaminococcales	Acidaminococcaceae	NA	71	49	0	0
Acidobacteriota	Acidobacteriae	Acidobacteriales	Acidobacteriaceae (Subgroup 1)	NA	0	0	0	0
Actinobacteriota	Actinobacteria	Actinomycetales	Actinomycetaceae	NA	44	84	0	0
Proteobacteria	Alphaproteobacteria	Rhodospirillales	AEGEAN-169 marine group	NA	63	190	0	122
Planctomycetota	Phycisphaerae	Phycisphaerales	AKAU3564 sediment group	NA	0	0	0	61
Chloroflexi	Chloroflexia	Kallotenuales	AKIW781	NA	50	9	0	0
Chloroflexi	Chloroflexia	Thermomicrobiales	AKYG1722	NA	71	0	0	0
Bacteroidota	Bacteroidia	Sphingobacteriales	AKYH767	NA	0	0	0	0
Firmicutes	Bacilli	Alicyclobacillales	Alicyclobacillaceae	NA	0	0	0	0
Proteobacteria	Gammaproteobacteria	Enterobacterales	Alteromonadaceae	NA	0	0	0	0
Myxococcota	Polyangia	Polyangiales	Amb-16S-1034	NA	0	0	0	0
Proteobacteria	Alphaproteobacteria	Rhizobiales	Amb-16S-1323	NA	0	0	0	0
Bacteroidota	Bacteroidia	Cytophagales	Amoebophilaceae	NA	0	0	0	0
Chloroflexi	Anaerolineae	Anaerolineales	Anaerolineaceae	NA	65	0	0	93
Chloroflexi	Anaerolineae	Ardenticatenales	Ardenticatenaceae	NA	0	0	0	0
Proteobacteria	Gammaproteobacteria	Arenicellales	Arenicellaceae	NA	0	0	0	0
Proteobacteria	Alphaproteobacteria	Azospirillales	Azospirillaceae	NA	69	0	0	0
Proteobacteria	Gammaproteobacteria	Burkholderiales	B1-7BS	NA	0	0	0	0
Dependentiae	Babeliae	Babeliales	Babeliaceae	NA	0	0	0	0
Firmicutes	Bacilli	Bacillales	Bacillaceae	NA	0	231	73	335
Bdellovibrionota	Bdellovibrionia	Bacteriovoracales	Bacteriovoracaceae	NA	0	0	0	0
Bacteroidota	Bacteroidia	Bacteroidales	Bacteroidetes BD2-2	NA	60	151	31	52
Proteobacteria	Alphaproteobacteria	Rhizobiales	Beijerinckiaceae	NA	0	38	0	0
Actinobacteriota	Actinobacteria	Micrococcales	Beutenbergiaceae	NA	0	0	0	0
Myxococcota	Polyangia	Polyangiales	BIrii41	NA	0	0	0	0
Acidobacteriota	Blastocatellia	Blastocatellales	Blastocatellaceae	NA	91	95	0	0
Bacteroidota	Kryptonia	Kryptoniales	BSV26	NA	64	0	0	0
Proteobacteria	Alphaproteobacteria	Caedibacterales	Caedibacteraceae	NA	0	0	78	0
Chloroflexi	Anaerolineae	Caldilineales	Caldilineaceae	NA	241	99	60	0
Calditrichota	Calditrichia	Calditrichales	Calditrichaceae	NA	0	65	0	73
Firmicutes	Clostridia	Clostridiales	Caloramatoraceae	NA	0	0	0	0
Proteobacteria	Alphaproteobacteria	Caulobacterales	Caulobacteraceae	NA	0	0	0	0
Proteobacteria	Gammaproteobacteria	Pseudomonadales	Cellvibrionaceae	NA	82	127	126	227
Bacteroidota	Bacteroidia	Chitinophagales	Chitinophagaceae	NA	0	68	62	51
Chloroflexi	Chloroflexia	Chloroflexales	Chloroflexaceae	NA	0	0	0	0
Firmicutes	Clostridia	Christensenellales	Christensenellaceae	NA	109	0	0	0
Verrucomicrobiota	Verrucomicrobiae	Chthoniobacterales	Chthoniobacteraceae	NA	0	0	0	0
Proteobacteria	Alphaproteobacteria	SAR11 clade	Clade I	NA	0	62	0	90
Proteobacteria	Alphaproteobacteria	SAR11 clade	Clade II	NA	57	138	128	336
Proteobacteria	Alphaproteobacteria	SAR11 clade	Clade IV	NA	90	91	0	0
Proteobacteria	Gammaproteobacteria	Enterobacterales	Colwelliaceae	NA	0	0	0	0
Proteobacteria	Gammaproteobacteria	Burkholderiales	Comamonadaceae	NA	0	28	36	0
Actinobacteriota	Coriobacteriia	Coriobacteriales	Coriobacteriales Incertae Sedis	NA	62	22	0	0
Verrucomicrobiota	Chlamydiae	Chlamydiales	Criblamydiaceae	NA	0	80	0	0
Bacteroidota	Bacteroidia	Flavobacteriales	Cryomorphaceae	NA	0	60	0	0
Actinobacteriota	Actinobacteria	Frankiales	Cryptosporangiaceae	NA	0	0	0	0
Verrucomicrobiota	Chlamydiae	Chlamydiales	cvE6	NA	0	79	0	0
Cyanobacteria	Cyanobacteriia	Synechococcales	Cyanobiaceae	NA	0	61	0	0
Bacteroidota	Bacteroidia	Cytophagales	Cyclobacteriaceae	NA	0	157	0	217
Proteobacteria	Alphaproteobacteria	Rhizobiales	D05-2	NA	0	0	0	0
Desulfobacterota	Desulfobulbia	Desulfobulbales	Desulfobulbaceae	NA	0	0	0	0
Desulfobacterota	Desulfobulbia	Desulfobulbales	Desulfocapsaceae	NA	0	0	0	0
Verrucomicrobiota	Verrucomicrobiae	Verrucomicrobiales	DEV007	NA	41	75	92	178
Proteobacteria	Alphaproteobacteria	Rhizobiales	Devosiaceae	NA	45	74	0	0
Proteobacteria	Gammaproteobacteria	Diplorickettsiales	Diplorickettsiaceae	NA	0	0	0	0
Proteobacteria	Gammaproteobacteria	Ectothiorhodospirales	Ectothiorhodospiraceae	NA	0	0	164	0
Myxococcota	Polyangia	Polyangiales	Eel-36e1D6	NA	0	0	0	0
Proteobacteria	Gammaproteobacteria	Enterobacterales	Enterobacteriaceae	NA	248	292	34	4
Entotheonellaeota	Entotheonellia	Entotheonellales	Entotheonellaceae	NA	0	9	68	0
Bacteroidota	Bacteroidia	Sphingobacteriales	env.OPS 17	NA	0	0	0	0
Proteobacteria	Gammaproteobacteria	Enterobacterales	Erwiniaceae	NA	0	0	0	0
Actinobacteriota	Actinobacteria	Euzebyales	Euzebyaceae	NA	0	0	0	0
Fibrobacterota	Fibrobacteria	Fibrobacterales	Fibrobacteraceae	NA	0	0	0	0
Armatimonadota	Fimbriimonadia	Fimbriimonadales	Fimbriimonadaceae	NA	0	9	0	0
Bacteroidota	Bacteroidia	Flavobacteriales	Flavobacteriaceae	NA	0	143	0	137
Proteobacteria	Alphaproteobacteria	Kiloniellales	Fodinicurvataceae	NA	0	0	0	0
Proteobacteria	Alphaproteobacteria	Tistrellales	Geminicoccaceae	NA	0	0	0	0
Planctomycetota	Planctomycetes	Gemmatales	Gemmataceae	NA	121	388	0	132
Gemmatimonadota	Gemmatimonadetes	Gemmatimonadales	Gemmatimonadaceae	NA	289	299	187	87
Actinobacteriota	Actinobacteria	Frankiales	Geodermatophilaceae	NA	63	0	0	0
Planctomycetota	Planctomycetes	Planctomycetales	Gimesiaceae	NA	0	0	0	0
Firmicutes	Clostridia	Gracilibacteraceae	Gracilibacter	NA	68	0	65	61
Nanoarchaeota	Nanoarchaeia	Woesearchaeales	GW2011_GWC1_47_15	NA	0	90	69	0
Proteobacteria	Alphaproteobacteria	Holosporales	Holosporaceae	NA	0	61	0	0
Firmicutes	Clostridia	Oscillospirales	Hungateiclostridiaceae	NA	0	67	0	0
Hydrogenedentes	Hydrogenedentia	Hydrogenedentiales	Hydrogenedensaceae	NA	55	0	47	0
Proteobacteria	Alphaproteobacteria	Rhizobiales	Hyphomicrobiaceae	NA	0	92	58	62
Proteobacteria	Alphaproteobacteria	Caulobacterales	Hyphomonadaceae	NA	0	0	0	0
Actinobacteriota	Acidimicrobiia	Microtrichales	Ilumatobacteraceae	NA	44	0	0	58
Actinobacteriota	Actinobacteria	Micrococcales	Intrasporangiaceae	NA	0	0	0	0
Planctomycetota	Planctomycetes	Isosphaerales	Isosphaeraceae	NA	1035	1136	680	603
Chloroflexi	Ktedonobacteria	Ktedonobacterales	JG30-KF-AS9	NA	59	62	114	136
Chloroflexi	Chloroflexia	Thermomicrobiales	JG30-KF-CM45	NA	289	504	72	68
Proteobacteria	Alphaproteobacteria	Rhizobiales	KF-JG30-B3	NA	0	78	0	0
Proteobacteria	Gammaproteobacteria	Pseudomonadales	KI89A clade	NA	0	174	0	0
Proteobacteria	Alphaproteobacteria	Kiloniellales	Kiloniellaceae	NA	54	69	226	185
Chloroflexi	Ktedonobacteria	Ktedonobacterales	Ktedonobacteraceae	NA	0	54	0	0
Firmicutes	Clostridia	Lachnospirales	Lachnospiraceae	NA	0	120	8	66
Latescibacterota	Latescibacteria	Latescibacterales	Latescibacteraceae	NA	0	0	0	0
Cyanobacteria	Cyanobacteriia	Leptolyngbyales	Leptolyngbyaceae	NA	0	0	0	0
Firmicutes	Limnochordia	Limnochordales	Limnochordaceae	NA	0	0	0	0
Gemmatimonadota	Longimicrobia	Longimicrobiales	Longimicrobiaceae	NA	93	0	0	0
Firmicutes	Clostridia	Gracilibacteraceae	Lutispora	NA	0	0	0	0
Patescibacteria	Saccharimonadia	Saccharimonadales	LWQ8	NA	34	135	0	0
Proteobacteria	Alphaproteobacteria	Rhodospirillales	Magnetospiraceae	NA	45	73	29	0
Bacteroidota	Bacteroidia	Bacteroidales	Marinifilaceae	NA	0	0	0	70
Proteobacteria	Gammaproteobacteria	Pseudomonadales	MBAE14	NA	0	0	0	0
Verrucomicrobiota	Verrucomicrobiae	Methylacidiphilales	Methylacidiphilaceae	NA	0	73	0	0
Proteobacteria	Alphaproteobacteria	Rhizobiales	Methyloligellaceae	NA	89	164	65	100
Proteobacteria	Gammaproteobacteria	Burkholderiales	Methylophilaceae	NA	0	0	0	0
Proteobacteria	Alphaproteobacteria	Micavibrionales	Micavibrionaceae	NA	0	0	0	0
Actinobacteriota	Actinobacteria	Micrococcales	Microbacteriaceae	NA	0	27	0	49
Actinobacteriota	Actinobacteria	Micrococcales	Micrococcaceae	NA	0	0	0	0
Actinobacteriota	Actinobacteria	Micromonosporales	Micromonosporaceae	NA	47	0	0	0
Proteobacteria	Alphaproteobacteria	Micropepsales	Micropepsaceae	NA	0	137	0	0
Bacteroidota	Bacteroidia	Cytophagales	Microscillaceae	NA	0	55	0	25
Actinobacteriota	Acidimicrobiia	Microtrichales	Microtrichaceae	NA	0	0	0	0
Proteobacteria	Alphaproteobacteria	Rickettsiales	Mitochondria	NA	873	1096	850	1048
Proteobacteria	Gammaproteobacteria	Pseudomonadales	Moraxellaceae	NA	0	0	0	0
Bacteroidota	Bacteroidia	Bacteroidales	Muribaculaceae	NA	76	0	0	0
Myxococcota	Myxococcia	Myxococcales	Myxococcaceae	NA	0	0	0	0
Acidobacteriota	Blastocatellia	45597	NA	NA	0	59	96	0
Bdellovibrionota	Oligoflexia	0319-6G20	NA	NA	0	0	0	0
Actinobacteriota	Actinobacteria	0319-7L14	NA	NA	0	0	0	0
Acidobacteriota	Acidobacteriae	Acidobacteriales	NA	NA	0	0	0	191
Actinobacteriota	Acidimicrobiia	Actinomarinales	NA	NA	0	301	161	151
Aerophobota	Aerophobia	Aerophobales	NA	NA	0	0	83	106
Acidobacteriota	Aminicenantia	Aminicenantales	NA	NA	0	124	0	179
Planctomycetota	Phycisphaerae	Amsterdam-1B-07	NA	NA	0	0	0	65
Verrucomicrobiota	Verrucomicrobiae	Arctic97B-4 marine group	NA	NA	0	47	92	0
Chloroflexi	Anaerolineae	Ardenticatenales	NA	NA	0	29	0	0
Armatimonadota	Armatimonadia	Armatimonadales	NA	NA	0	0	0	0
Proteobacteria	Gammaproteobacteria	AT-s16	NA	NA	0	19	73	0
Proteobacteria	Gammaproteobacteria	AT-s2-59	NA	NA	43	0	0	65
Proteobacteria	Alphaproteobacteria	AT-s3-44	NA	NA	0	0	0	0
Proteobacteria	Alphaproteobacteria	Azospirillales	NA	NA	33	46	0	0
Proteobacteria	Gammaproteobacteria	B2M28	NA	NA	0	0	0	0
Dependentiae	Babeliae	Babeliales	NA	NA	0	0	0	0
Firmicutes	Bacilli	Bacillales	NA	NA	198	172	0	183
Bacteroidota	Bacteroidia	Bacteroidales	NA	NA	0	66	0	0
Bacteroidota	Bacteroidia	Bacteroidetes VC2.1 Bac22	NA	NA	45	141	0	0
Proteobacteria	Gammaproteobacteria	BD7-8	NA	NA	62	0	0	45
Myxococcota	Polyangia	Blfdi19	NA	NA	0	144	0	0
Desulfobacterota	Desulfuromonadia	Bradymonadales	NA	NA	42	47	0	0
Proteobacteria	Gammaproteobacteria	Burkholderiales	NA	NA	0	0	0	0
Chloroflexi	Ktedonobacteria	C0119	NA	NA	0	0	0	0
Patescibacteria	Parcubacteria	Candidatus Adlerbacteria	NA	NA	0	0	0	0
Patescibacteria	Parcubacteria	Candidatus Azambacteria	NA	NA	0	0	0	0
Patescibacteria	Parcubacteria	Candidatus Campbellbacteria	NA	NA	66	0	0	0
Patescibacteria	Parcubacteria	Candidatus Kaiserbacteria	NA	NA	0	36	72	76
Patescibacteria	Microgenomatia	Candidatus Levybacteria	NA	NA	0	0	0	0
Patescibacteria	Parcubacteria	Candidatus Liptonbacteria	NA	NA	0	0	0	0
Patescibacteria	ABY1	Candidatus Magasanikbacteria	NA	NA	0	0	0	0
Patescibacteria	Parcubacteria	Candidatus Moranbacteria	NA	NA	0	0	0	0
Patescibacteria	Parcubacteria	Candidatus Nomurabacteria	NA	NA	0	0	0	0
Patescibacteria	Microgenomatia	Candidatus Pacebacteria	NA	NA	0	0	0	0
Patescibacteria	Parcubacteria	Candidatus Staskawiczbacteria	NA	NA	0	0	0	0
Patescibacteria	Parcubacteria	Candidatus Terrybacteria	NA	NA	0	0	0	0
Patescibacteria	ABY1	Candidatus Uhrbacteria	NA	NA	0	0	0	0
Patescibacteria	Parcubacteria	Candidatus Vogelbacteria	NA	NA	0	0	0	0
Patescibacteria	Microgenomatia	Candidatus Woesebacteria	NA	NA	0	0	0	73
Patescibacteria	Microgenomatia	Candidatus Woykebacteria	NA	NA	0	0	0	0
Proteobacteria	Alphaproteobacteria	Caulobacterales	NA	NA	0	63	0	0
Proteobacteria	Gammaproteobacteria	CCD24	NA	NA	0	77	13	0
Planctomycetota	Phycisphaerae	CCM11a	NA	NA	0	43	85	98
Proteobacteria	Gammaproteobacteria	CCM19a	NA	NA	0	0	0	0
Bacteroidota	Bacteroidia	Chitinophagales	NA	NA	65	62	90	0
Verrucomicrobiota	Chlamydiae	Chlamydiales	NA	NA	0	0	0	0
Armatimonadota	Chthonomonadetes	Chthonomonadales	NA	NA	3	58	0	0
Firmicutes	Clostridia	Clostridiales	NA	NA	0	0	0	0
Cyanobacteria	Cyanobacteriia	Cyanobacteriales	NA	NA	0	94	0	0
Dadabacteria	Dadabacteriia	Dadabacteriales	NA	NA	61	21	0	0
Proteobacteria	Alphaproteobacteria	Defluviicoccales	NA	NA	152	68	147	0
Acidobacteriota	Blastocatellia	DS-100	NA	NA	14	0	0	0
Proteobacteria	Gammaproteobacteria	EC3	NA	NA	0	70	0	0
Proteobacteria	Gammaproteobacteria	Ectothiorhodospirales	NA	NA	0	0	0	0
Acidobacteriota	Acidobacteriae	Elev-16S-1166	NA	NA	0	26	0	0
Proteobacteria	Alphaproteobacteria	Elsterales	NA	NA	0	51	0	0
Proteobacteria	Gammaproteobacteria	Enterobacterales	NA	NA	0	0	74	0
Proteobacteria	Gammaproteobacteria	EPR3968-O8a-Bc78	NA	NA	0	67	0	93
Firmicutes	Bacilli	Erysipelotrichales	NA	NA	0	0	0	0
Proteobacteria	Gammaproteobacteria	EV818SWSAP88	NA	NA	0	0	0	0
Actinobacteriota	Actinobacteria	FFCH16263	NA	NA	0	0	0	0
Myxococcota	Polyangia	FFCH16767	NA	NA	0	0	0	0
Actinobacteriota	Actinobacteria	Frankiales	NA	NA	0	0	0	0
Chloroflexi	Dehalococcoidia	FW22	NA	NA	0	0	0	63
Proteobacteria	Gammaproteobacteria	Ga0077536	NA	NA	59	0	68	0
Actinobacteriota	Thermoleophilia	Gaiellales	NA	NA	216	186	65	131
Chloroflexi	Dehalococcoidia	GIF3	NA	NA	0	0	59	0
Proteobacteria	Gammaproteobacteria	Granulosicoccales	NA	NA	71	0	0	0
Proteobacteria	Gammaproteobacteria	HgCo23	NA	NA	0	0	0	0
Proteobacteria	Gammaproteobacteria	HOC36	NA	NA	0	62	64	134
Firmicutes	Limnochordia	Hydrogenispora	NA	NA	94	0	0	72
Actinobacteriota	Acidimicrobiia	IMCC26256	NA	NA	0	140	50	61
Proteobacteria	Gammaproteobacteria	JG36-TzT-191	NA	NA	0	0	0	0
Patescibacteria	Gracilibacteria	JGI 0000069-P22	NA	NA	0	0	68	63
Proteobacteria	Gammaproteobacteria	JTB23	NA	NA	0	0	0	0
Bacteroidota	Kapabacteria	Kapabacteriales	NA	NA	0	0	0	0
Proteobacteria	Gammaproteobacteria	KF-JG30-C25	NA	NA	0	0	75	0
Verrucomicrobiota	Chlamydiae	LD1-PA32	NA	NA	0	0	0	0
Elusimicrobiota	Elusimicrobia	Lineage IV	NA	NA	0	0	0	0
Thermoplasmatota	Thermoplasmata	Marine Group II	NA	NA	142	82	75	122
Firmicutes	Limnochordia	MBA03	NA	NA	46	0	0	0
Proteobacteria	Gammaproteobacteria	MBMPE27	NA	NA	30	82	0	37
Proteobacteria	Gammaproteobacteria	MD2904-B13	NA	NA	67	0	0	0
Proteobacteria	Alphaproteobacteria	Micavibrionales	NA	NA	127	207	7	34
Actinobacteriota	Actinobacteria	Micrococcales	NA	NA	0	0	0	0
Actinobacteriota	Acidimicrobiia	Microtrichales	NA	NA	112	0	0	0
Myxococcota	Polyangia	mle1-27	NA	NA	0	0	0	0
Planctomycetota	Phycisphaerae	mle1-8	NA	NA	0	0	0	0
Myxococcota	Polyangia	MSB-4B10	NA	NA	0	0	0	0
Chloroflexi	Anaerolineae	MSB-5B2	NA	NA	0	75	0	0
Chloroflexi	Anaerolineae	MSB-5E12	NA	NA	0	0	0	0
Chloroflexi	Dehalococcoidia	MSBL5	NA	NA	0	62	63	0
Elusimicrobiota	Elusimicrobia	MVP-88	NA	NA	0	0	0	0
Acetothermia	Acetothermiia	NA	NA	NA	0	0	0	0
Actinobacteriota	Acidimicrobiia	NA	NA	NA	0	0	0	0
Acidobacteriota	Acidobacteriae	NA	NA	NA	0	0	0	0
Actinobacteriota	Actinobacteria	NA	NA	NA	0	0	0	0
Gemmatimonadota	AKAU4049	NA	NA	NA	0	0	0	0
Proteobacteria	Alphaproteobacteria	NA	NA	NA	127	469	0	93
Chloroflexi	Anaerolineae	NA	NA	NA	170	151	118	62
Myxococcota	bacteriap25	NA	NA	NA	139	229	71	233
Crenarchaeota	Bathyarchaeia	NA	NA	NA	0	0	0	85
Gemmatimonadota	BD2-11 terrestrial group	NA	NA	NA	0	66	0	0
Planctomycetota	BD7-11	NA	NA	NA	0	0	0	0
Patescibacteria	Berkelbacteria	NA	NA	NA	0	0	62	0
Nitrospirota	BMS9AB35	NA	NA	NA	0	92	0	0
Firmicutes	Clostridia	NA	NA	NA	0	0	0	0
Cyanobacteria	Cyanobacteriia	NA	NA	NA	9	12	13	24
Firmicutes	D8A-2	NA	NA	NA	0	0	0	0
Chloroflexi	Dehalococcoidia	NA	NA	NA	0	85	0	0
Patescibacteria	Dojkabacteria	NA	NA	NA	0	0	0	0
Proteobacteria	Gammaproteobacteria	NA	NA	NA	0	86	60	148
Chloroflexi	Gitt-GS-136	NA	NA	NA	57	64	0	0
Patescibacteria	Gracilibacteria	NA	NA	NA	0	62	61	0
Chloroflexi	JG30-KF-CM66	NA	NA	NA	0	132	0	0
Chloroflexi	KD4-96	NA	NA	NA	59	631	79	0
Elusimicrobiota	Lineage IIb	NA	NA	NA	0	0	0	0
Actinobacteriota	MB-A2-108	NA	NA	NA	55	103	0	0
Gemmatimonadota	MD2902-B12	NA	NA	NA	0	0	0	0
Patescibacteria	Microgenomatia	NA	NA	NA	0	0	0	0
Acidobacteriota	NA	NA	NA	NA	0	0	0	0
Actinobacteriota	NA	NA	NA	NA	0	75	0	0
Armatimonadota	NA	NA	NA	NA	0	0	0	0
Bdellovibrionota	NA	NA	NA	NA	0	0	0	0
Chloroflexi	NA	NA	NA	NA	0	58	0	61
Desulfobacterota	NA	NA	NA	NA	69	131	0	0
DTB120	NA	NA	NA	NA	0	0	0	0
FCPU426	NA	NA	NA	NA	0	0	0	0
Firmicutes	NA	NA	NA	NA	24	45	0	85
GAL15	NA	NA	NA	NA	0	0	0	0
Gemmatimonadota	NA	NA	NA	NA	0	0	0	0
Latescibacterota	NA	NA	NA	NA	0	27	0	0
Marinimicrobia (SAR406 clade)	NA	NA	NA	NA	142	487	168	107
MBNT15	NA	NA	NA	NA	64	0	0	0
Myxococcota	NA	NA	NA	NA	0	0	0	0
NA	NA	NA	NA	NA	159	439	221	351
NB1-j	NA	NA	NA	NA	65	479	63	403
Nitrospinota	NA	NA	NA	NA	0	64	73	0
Patescibacteria	NA	NA	NA	NA	0	0	0	0
Planctomycetota	NA	NA	NA	NA	0	0	0	0
Poribacteria	NA	NA	NA	NA	0	0	68	0
Proteobacteria	NA	NA	NA	NA	0	0	0	28
RCP2-54	NA	NA	NA	NA	0	0	0	0
SAR324 clade(Marine group B)	NA	NA	NA	NA	354	288	308	459
Schekmanbacteria	NA	NA	NA	NA	0	0	0	60
Sva0485	NA	NA	NA	NA	0	0	0	25
TA06	NA	NA	NA	NA	116	105	109	0
WPS-2	NA	NA	NA	NA	0	0	0	0
WS2	NA	NA	NA	NA	0	0	0	0
Zixibacteria	NA	NA	NA	NA	0	63	0	0
Chloroflexi	OLB14	NA	NA	NA	0	61	0	0
Planctomycetota	OM190	NA	NA	NA	61	90	0	105
Chloroflexi	P2-11E	NA	NA	NA	0	0	0	0
Patescibacteria	Parcubacteria	NA	NA	NA	0	0	63	85
Gemmatimonadota	PAUC43f marine benthic group	NA	NA	NA	0	0	0	0
Planctomycetota	Pla3 lineage	NA	NA	NA	0	90	80	198
Planctomycetota	Pla4 lineage	NA	NA	NA	0	14	0	0
Planctomycetota	Planctomycetes	NA	NA	NA	0	0	0	0
Myxococcota	Polyangia	NA	NA	NA	0	0	0	0
Gemmatimonadota	S0134 terrestrial group	NA	NA	NA	0	189	0	0
Cyanobacteria	Sericytochromatia	NA	NA	NA	0	62	0	0
Chloroflexi	SHA-26	NA	NA	NA	0	0	0	0
Acidobacteriota	Subgroup 11	NA	NA	NA	0	71	18	0
Acidobacteriota	Subgroup 18	NA	NA	NA	0	0	0	0
Acidobacteriota	Subgroup 20	NA	NA	NA	0	0	0	0
Acidobacteriota	Subgroup 21	NA	NA	NA	0	60	63	81
Acidobacteriota	Subgroup 22	NA	NA	NA	61	122	0	72
Acidobacteriota	Subgroup 25	NA	NA	NA	0	0	0	0
Acidobacteriota	Subgroup 5	NA	NA	NA	0	113	0	69
Nitrospirota	Thermodesulfovibrionia	NA	NA	NA	0	0	0	0
Actinobacteriota	Thermoleophilia	NA	NA	NA	0	0	0	0
Chloroflexi	TK10	NA	NA	NA	0	60	0	62
Chloroflexi	TK17	NA	NA	NA	0	0	0	0
Planctomycetota	vadinHA49	NA	NA	NA	0	0	0	0
Patescibacteria	WWE3	NA	NA	NA	0	0	0	0
Chloroflexi	Dehalococcoidia	Napoli-4B-65	NA	NA	0	0	0	0
Verrucomicrobiota	Omnitrophia	Omnitrophales	NA	NA	0	0	61	0
Acidobacteriota	Acidobacteriae	Paludibaculum	NA	NA	0	23	0	0
Acidobacteriota	Acidobacteriae	PAUC26f	NA	NA	0	35	0	0
Desulfobacterota	Desulfuromonadia	PB19	NA	NA	0	57	0	0
Actinobacteriota	Actinobacteria	PeM15	NA	NA	0	60	0	0
Proteobacteria	Gammaproteobacteria	pItb-vmat-80	NA	NA	0	67	0	67
Planctomycetota	Phycisphaerae	Pla1 lineage	NA	NA	0	0	0	0
Planctomycetota	Planctomycetes	Planctomycetales	NA	NA	26	415	167	62
Proteobacteria	Gammaproteobacteria	PLTA13	NA	NA	74	244	0	0
Myxococcota	Polyangia	Polyangiales	NA	NA	0	0	0	0
Proteobacteria	Gammaproteobacteria	Pseudomonadales	NA	NA	0	0	0	0
Proteobacteria	Gammaproteobacteria	R7C24	NA	NA	0	0	0	0
Chloroflexi	Anaerolineae	RBG-13-54-9	NA	NA	0	0	0	0
Cyanobacteria	Cyanobacteriia	RD017	NA	NA	0	0	0	0
Proteobacteria	Alphaproteobacteria	Rhizobiales	NA	NA	0	0	0	0
Proteobacteria	Alphaproteobacteria	Rhodospirillales	NA	NA	65	0	0	0
Proteobacteria	Alphaproteobacteria	Rickettsiales	NA	NA	0	0	0	0
Methylomirabilota	Methylomirabilia	Rokubacteriales	NA	NA	96	236	63	193
Chloroflexi	Dehalococcoidia	S085	NA	NA	70	137	103	75
Planctomycetota	Phycisphaerae	S-70	NA	NA	0	0	59	0
Patescibacteria	Saccharimonadia	Saccharimonadales	NA	NA	0	71	0	0
Proteobacteria	Gammaproteobacteria	Salinisphaerales	NA	NA	0	0	0	0
Proteobacteria	Alphaproteobacteria	SAR11 clade	NA	NA	0	134	0	117
Chloroflexi	Dehalococcoidia	SAR202 clade	NA	NA	59	553	192	431
Verrucomicrobiota	Verrucomicrobiae	S-BQ2-57 soil group	NA	NA	0	0	0	0
Chloroflexi	Anaerolineae	SBR1031	NA	NA	0	0	0	136
Chloroflexi	Anaerolineae	SJA-15	NA	NA	0	0	0	0
Actinobacteriota	Thermoleophilia	Solirubrobacterales	NA	NA	0	0	0	0
Acidobacteriota	Acidobacteriae	Subgroup 13	NA	NA	0	0	0	0
Acidobacteriota	Acidobacteriae	Subgroup 15	NA	NA	0	0	0	0
Acidobacteriota	Vicinamibacteria	Subgroup 17	NA	NA	0	76	0	73
Acidobacteriota	Acidobacteriae	Subgroup 2	NA	NA	84	0	0	0
Acidobacteriota	Holophagae	Subgroup 7	NA	NA	0	57	0	0
Acidobacteriota	Vicinamibacteria	Subgroup 9	NA	NA	0	0	0	0
Desulfobacterota	Syntrophobacteria	Syntrophobacterales	NA	NA	0	89	0	0
Proteobacteria	Gammaproteobacteria	SZB50	NA	NA	0	58	0	0
Planctomycetota	Phycisphaerae	Tepidisphaerales	NA	NA	0	18	0	0
Proteobacteria	Alphaproteobacteria	Thalassobaculales	NA	NA	0	0	0	0
Chloroflexi	Chloroflexia	Thermomicrobiales	NA	NA	0	0	0	0
Verrucomicrobiota	Verrucomicrobiae	UA11	NA	NA	0	0	0	0
Myxococcota	Polyangia	UASB-TL25	NA	NA	0	0	0	66
Proteobacteria	Gammaproteobacteria	UBA10353 marine group	NA	NA	99	128	59	0
Cyanobacteria	Vampirivibrionia	Vampirovibrionales	NA	NA	0	82	0	0
Firmicutes	Negativicutes	Veillonellales-Selenomonadales	NA	NA	0	0	0	0
Acidobacteriota	Vicinamibacteria	Vicinamibacterales	NA	NA	154	844	96	302
Nanoarchaeota	Nanoarchaeia	Woesearchaeales	NA	NA	0	0	0	0
Myxococcota	Polyangia	Nannocystales	Nannocystaceae	NA	0	0	0	0
Proteobacteria	Gammaproteobacteria	Burkholderiales	Neisseriaceae	NA	0	0	76	87
Proteobacteria	Gammaproteobacteria	Pseudomonadales	Nitrincolaceae	NA	0	0	0	79
Proteobacteria	Gammaproteobacteria	Nitrosococcales	Nitrosococcaceae	NA	61	55	0	100
Proteobacteria	Gammaproteobacteria	Burkholderiales	Nitrosomonadaceae	NA	0	0	85	0
Crenarchaeota	Nitrososphaeria	Nitrosopumilales	Nitrosopumilaceae	NA	0	0	0	92
Crenarchaeota	Nitrososphaeria	Nitrososphaerales	Nitrososphaeraceae	NA	0	62	0	0
Actinobacteriota	Actinobacteria	Propionibacteriales	Nocardioidaceae	NA	0	0	0	0
Cyanobacteria	Cyanobacteriia	Cyanobacteriales	Nostocaceae	NA	0	0	0	0
Bacteroidota	Bacteroidia	Sphingobacteriales	NS11-12 marine group	NA	0	0	0	0
Bacteroidota	Bacteroidia	Flavobacteriales	NS9 marine group	NA	0	78	63	87
Cyanobacteria	Vampirivibrionia	Obscuribacterales	Obscuribacteraceae	NA	0	0	0	0
Proteobacteria	Alphaproteobacteria	Parvibaculales	OCS116 clade	NA	62	0	0	0
Bdellovibrionota	Oligoflexia	Oligoflexales	Oligoflexaceae	NA	0	61	0	0
Proteobacteria	Gammaproteobacteria	Pseudomonadales	OM182 clade	NA	0	0	0	0
Verrucomicrobiota	Verrucomicrobiae	Opitutales	Opitutaceae	NA	0	0	0	0
Cyanobacteria	Cyanobacteriia	Cyanobacteriales	Oscillatoriaceae	NA	0	0	32	0
Firmicutes	Clostridia	Oscillospirales	Oscillospiraceae	NA	143	0	0	0
Proteobacteria	Gammaproteobacteria	Burkholderiales	Oxalobacteraceae	NA	0	0	0	0
Proteobacteria	Gammaproteobacteria	Pseudomonadales	P13-46	NA	0	0	0	0
Firmicutes	Bacilli	Paenibacillales	Paenibacillaceae	NA	0	135	0	0
Proteobacteria	Alphaproteobacteria	Paracaedibacterales	Paracaedibacteraceae	NA	106	117	100	161
Verrucomicrobiota	Chlamydiae	Chlamydiales	Parachlamydiaceae	NA	0	0	0	0
Proteobacteria	Alphaproteobacteria	Parvibaculales	Parvibaculaceae	NA	0	0	0	65
Verrucomicrobiota	Verrucomicrobiae	Pedosphaerales	Pedosphaeraceae	NA	0	207	0	131
Firmicutes	Clostridia	Peptostreptococcales-Tissierellales	Peptostreptococcaceae	NA	52	0	0	0
Thermotogota	Thermotogae	Petrotogales	Petrotogaceae	NA	0	0	0	0
Cyanobacteria	Cyanobacteriia	Cyanobacteriales	Phormidiaceae	NA	0	0	0	0
Bacteroidota	Ignavibacteria	Ignavibacteriales	PHOS-HE36	NA	0	0	0	61
Planctomycetota	Phycisphaerae	Phycisphaerales	Phycisphaeraceae	NA	61	0	0	58
Planctomycetota	Planctomycetes	Pirellulales	Pirellulaceae	NA	61	256	0	77
Firmicutes	Bacilli	Bacillales	Planococcaceae	NA	0	0	5	0
Myxococcota	Polyangia	Polyangiales	Polyangiaceae	NA	0	0	0	0
Bacteroidota	Bacteroidia	Bacteroidales	Prevotellaceae	NA	74	170	0	0
Bacteroidota	Bacteroidia	Bacteroidales	Prolixibacteraceae	NA	52	176	125	162
Proteobacteria	Alphaproteobacteria	Parvibaculales	PS1 clade	NA	0	0	0	0
Actinobacteriota	Actinobacteria	Pseudonocardiales	Pseudonocardiaceae	NA	0	0	0	63
Proteobacteria	Alphaproteobacteria	Reyranellales	Reyranellaceae	NA	0	0	0	0
Proteobacteria	Alphaproteobacteria	Rhizobiales	Rhizobiaceae	NA	0	2	0	0
Proteobacteria	Alphaproteobacteria	Rhizobiales	Rhizobiales Incertae Sedis	NA	38	34	0	147
Proteobacteria	Gammaproteobacteria	Xanthomonadales	Rhodanobacteraceae	NA	0	0	0	0
Proteobacteria	Alphaproteobacteria	Rhodobacterales	Rhodobacteraceae	NA	268	142	249	122
Proteobacteria	Alphaproteobacteria	Rhodospirillales	Rhodospirillaceae	NA	0	0	0	0
Bacteroidota	Rhodothermia	Rhodothermales	Rhodothermaceae	NA	0	16	0	0
Proteobacteria	Alphaproteobacteria	Rickettsiales	Rickettsiaceae	NA	146	80	117	66
Bacteroidota	Bacteroidia	Bacteroidales	Rikenellaceae	NA	0	0	0	25
Chloroflexi	Chloroflexia	Chloroflexales	Roseiflexaceae	NA	77	17	67	0
Planctomycetota	Planctomycetes	Planctomycetales	Rubinisphaeraceae	NA	0	0	0	0
Firmicutes	Clostridia	Oscillospirales	Ruminococcaceae	NA	0	108	0	0
Proteobacteria	Alphaproteobacteria	Rickettsiales	S25-593	NA	21	0	64	131
Patescibacteria	Saccharimonadia	Saccharimonadales	Saccharimonadaceae	NA	0	0	0	0
Myxococcota	Polyangia	Polyangiales	Sandaracinaceae	NA	0	14	0	155
Bacteroidota	Bacteroidia	Chitinophagales	Saprospiraceae	NA	0	143	50	0
Proteobacteria	Alphaproteobacteria	Puniceispirillales	SAR116 clade	NA	0	0	124	0
Proteobacteria	Gammaproteobacteria	Pseudomonadales	SAR86 clade	NA	0	127	0	182
Nanoarchaeota	Nanoarchaeia	Woesearchaeales	SCGC AAA011-D5	NA	0	72	0	0
Planctomycetota	Planctomycetes	Planctomycetales	Schlesneriaceae	NA	0	71	0	0
Proteobacteria	Gammaproteobacteria	Burkholderiales	SC-I-84	NA	0	61	0	0
Proteobacteria	Gammaproteobacteria	Chromatiales	Sedimenticolaceae	NA	34	0	0	43
Verrucomicrobiota	Chlamydiae	Chlamydiales	Simkaniaceae	NA	0	0	0	0
Proteobacteria	Alphaproteobacteria	Rickettsiales	SM2D12	NA	0	0	0	0
Proteobacteria	Gammaproteobacteria	Salinisphaerales	Solimonadaceae	NA	0	14	0	0
Actinobacteriota	Thermoleophilia	Solirubrobacterales	Solirubrobacteraceae	NA	0	0	0	0
Proteobacteria	Alphaproteobacteria	Sphingomonadales	Sphingomonadaceae	NA	0	0	0	65
Spirochaetota	Spirochaetia	Spirochaetales	Spirochaetaceae	NA	0	72	0	0
Bacteroidota	Bacteroidia	Cytophagales	Spirosomaceae	NA	0	0	0	0
Actinobacteriota	Actinobacteria	Frankiales	Sporichthyaceae	NA	0	0	0	0
Firmicutes	Bacilli	Bacillales	Sporolactobacillaceae	NA	0	35	0	130
Firmicutes	Negativicutes	Veillonellales-Selenomonadales	Sporomusaceae	NA	0	0	0	0
Proteobacteria	Gammaproteobacteria	Steroidobacterales	Steroidobacteraceae	NA	0	0	0	0
Actinobacteriota	Actinobacteria	Streptomycetales	Streptomycetaceae	NA	0	0	0	0
Actinobacteriota	Actinobacteria	Streptosporangiales	Streptosporangiaceae	NA	0	65	0	0
Firmicutes	Sulfobacillia	Sulfobacillales	Sulfobacillaceae	NA	0	0	0	0
Desulfobacterota	Desulfuromonadia	Desulfuromonadales	Sva1033	NA	0	0	0	0
Firmicutes	Symbiobacteriia	Symbiobacteriales	Symbiobacteraceae	NA	0	0	0	0
Synergistota	Synergistia	Synergistales	Synergistaceae	NA	0	71	0	0
Firmicutes	Desulfitobacteriia	Desulfitobacteriales	TC1	NA	0	32	71	55
Planctomycetota	Phycisphaerae	Tepidisphaerales	Tepidisphaeraceae	NA	0	0	0	0
Proteobacteria	Alphaproteobacteria	Rhodospirillales	Terasakiellaceae	NA	50	69	0	151
Firmicutes	Bacilli	Thermoactinomycetales	Thermoactinomycetaceae	NA	0	0	0	0
Actinobacteriota	Actinobacteria	Streptosporangiales	Thermomonosporaceae	NA	0	0	0	58
Proteobacteria	Gammaproteobacteria	Ectothiorhodospirales	Thioalkalispiraceae	NA	0	45	0	0
Proteobacteria	Gammaproteobacteria	Pseudomonadales	Thioglobaceae	NA	35	0	0	0
Proteobacteria	Gammaproteobacteria	Thiotrichales	Thiotrichaceae	NA	93	70	59	0
Proteobacteria	Gammaproteobacteria	Burkholderiales	TRA3-20	NA	0	28	61	0
Firmicutes	Bacilli	Entomoplasmatales	type III	NA	0	0	0	0
Dependentiae	Babeliae	Babeliales	UBA12409	NA	0	0	0	0
Proteobacteria	Gammaproteobacteria	Gammaproteobacteria Incertae Sedis	Unknown Family	NA	107	369	260	214
Dependentiae	Babeliae	Babeliales	Vermiphilaceae	NA	0	0	0	0
Verrucomicrobiota	Verrucomicrobiae	Verrucomicrobiales	Verrucomicrobiaceae	NA	115	61	0	0
Acidobacteriota	Vicinamibacteria	Vicinamibacterales	Vicinamibacteraceae	NA	121	438	58	0
Planctomycetota	Phycisphaerae	Tepidisphaerales	WD2101 soil group	NA	613	537	118	224
Patescibacteria	Saccharimonadia	Saccharimonadales	WWH38	NA	0	0	0	0
Methylomirabilota	Methylomirabilia	Rokubacteriales	WX65	NA	0	0	0	0
Proteobacteria	Alphaproteobacteria	Rhizobiales	Xanthobacteraceae	NA	13	259	108	81
Proteobacteria	Gammaproteobacteria	Xanthomonadales	Xanthomonadaceae	NA	0	0	0	0
Patescibacteria	Saccharimonadia	Saccharimonadales	YM_S32_TM7_50_20	NA	0	0	0	0
Actinobacteriota	Actinobacteria	Frankiales	Nakamurellaceae	Nakamurella	0	0	0	0
Myxococcota	Polyangia	Nannocystales	Nannocystaceae	Nannocystis	0	0	0	0
Proteobacteria	Alphaproteobacteria	Rhizobiales	Beijerinckiaceae	Neo-b11	0	35	0	0
Verrucomicrobiota	Chlamydiae	Chlamydiales	Parachlamydiaceae	Neochlamydia	0	60	386	338
Proteobacteria	Alphaproteobacteria	Rhizobiales	Rhizobiaceae	Neorhizobium	0	65	0	0
Bacteroidota	Bacteroidia	Chitinophagales	Chitinophagaceae	Niastella	0	0	0	0
Proteobacteria	Alphaproteobacteria	Rhizobiales	Rhizobiaceae	Nitratireductor	0	0	0	0
Proteobacteria	Alphaproteobacteria	Rhizobiales	Xanthobacteraceae	Nitrobacter	0	0	0	0
Chloroflexi	Chloroflexia	Thermomicrobiales	Thermomicrobiaceae	Nitrolancea	0	0	0	0
Proteobacteria	Gammaproteobacteria	Burkholderiales	Nitrosomonadaceae	Nitrosomonas	0	0	0	0
Proteobacteria	Gammaproteobacteria	Burkholderiales	Nitrosomonadaceae	Nitrosospira	0	0	0	81
Nitrospinota	Nitrospinia	Nitrospinales	Nitrospinaceae	Nitrospina	42	0	0	0
Nitrospirota	Nitrospiria	Nitrospirales	Nitrospiraceae	Nitrospira	108	592	0	149
Proteobacteria	Alphaproteobacteria	Azospirillales	Azospirillaceae	Niveispirillum	0	0	0	0
Firmicutes	Clostridia	Oscillospirales	Oscillospiraceae	NK4A214 group	58	0	28	0
Actinobacteriota	Actinobacteria	Corynebacteriales	Nocardiaceae	Nocardia	0	60	0	0
Actinobacteriota	Actinobacteria	Propionibacteriales	Nocardioidaceae	Nocardioides	217	73	73	106
Cyanobacteria	Cyanobacteriia	Phormidesmiales	Nodosilineaceae	Nodosilinea PCC-7104	0	0	46	0
Cyanobacteria	Cyanobacteriia	Cyanobacteriales	Nostocaceae	Nodularia PCC-9350	0	34	0	0
Actinobacteriota	Actinobacteria	Streptosporangiales	Streptosporangiaceae	Nonomuraea	0	0	0	0
Proteobacteria	Alphaproteobacteria	Rhizobiales	Rhizobiales Incertae Sedis	Nordella	0	0	0	95
Cyanobacteria	Cyanobacteriia	Cyanobacteriales	Nostocaceae	Nostoc PCC-7107	0	0	0	0
Cyanobacteria	Cyanobacteriia	Cyanobacteriales	Nostocaceae	Nostoc PCC-73102	0	0	0	0
Proteobacteria	Gammaproteobacteria	Burkholderiales	Oxalobacteraceae	Noviherbaspirillum	0	0	0	0
Proteobacteria	Alphaproteobacteria	Sphingomonadales	Sphingomonadaceae	Novosphingobium	554	530	193	138
Bacteroidota	Bacteroidia	Flavobacteriales	Flavobacteriaceae	NS2b marine group	0	126	42	56
Bacteroidota	Bacteroidia	Flavobacteriales	Flavobacteriaceae	NS3a marine group	0	0	0	0
Bacteroidota	Bacteroidia	Flavobacteriales	Flavobacteriaceae	NS4 marine group	0	91	33	0
Bacteroidota	Bacteroidia	Flavobacteriales	Flavobacteriaceae	NS5 marine group	0	68	0	0
Proteobacteria	Gammaproteobacteria	Burkholderiales	Nitrosomonadaceae	oc32	0	0	0	0
Deinococcota	Deinococci	Thermales	Thermaceae	Oceanithermus	0	0	0	0
Firmicutes	Bacilli	Bacillales	Bacillaceae	Oceanobacillus	0	0	0	0
Proteobacteria	Alphaproteobacteria	Rhizobiales	Rhizobiaceae	Ochrobactrum	0	92	0	67
Bacteroidota	Bacteroidia	Cytophagales	Microscillaceae	Ohtaekwangia	0	67	0	0
Bacteroidota	Bacteroidia	Cytophagales	Microscillaceae	OLB12	0	0	0	0
Chloroflexi	Anaerolineae	SBR1031	A4b	OLB13	0	0	0	0
Acidobacteriota	Blastocatellia	Blastocatellales	Blastocatellaceae	OLB17	0	0	0	0
Proteobacteria	Gammaproteobacteria	Pseudomonadales	Oleiphilaceae	Oleiphilus	0	0	0	0
Bdellovibrionota	Oligoflexia	Oligoflexales	Oligoflexaceae	Oligoflexus	0	0	0	0
Bdellovibrionota	Bdellovibrionia	Bdellovibrionales	Bdellovibrionaceae	OM27 clade	75	258	0	0
Proteobacteria	Gammaproteobacteria	Burkholderiales	Methylophilaceae	OM43 clade	0	0	0	0
Proteobacteria	Gammaproteobacteria	Pseudomonadales	Halieaceae	OM60(NOR5) clade	0	0	0	0
Proteobacteria	Alphaproteobacteria	Thalassobaculales	Nisaeaceae	OM75 clade	0	74	0	0
Verrucomicrobiota	Verrucomicrobiae	Opitutales	Opitutaceae	Opitutus	0	35	0	0
Actinobacteriota	Actinobacteria	Micrococcales	Intrasporangiaceae	Ornithinibacter	0	0	0	0
Cyanobacteria	Cyanobacteriia	Cyanobacteriales	Oscillatoriaceae	Oscillatoria PCC-6304	0	0	0	0
Cyanobacteria	Cyanobacteriia	Leptolyngbyales	Leptolyngbyaceae	Oscillatoria SAG 1459-8	0	0	0	0
Proteobacteria	Gammaproteobacteria	Burkholderiales	Comamonadaceae	Ottowia	0	0	0	0
Firmicutes	Bacilli	Paenibacillales	Paenibacillaceae	Oxalophagus	0	0	0	69
Firmicutes	Clostridia	Clostridiales	Oxobacteraceae	Oxobacter	0	0	0	0
Myxococcota	Myxococcia	Myxococcales	Myxococcaceae	P3OB-42	0	0	0	0
Actinobacteriota	Actinobacteria	Micrococcales	Micrococcaceae	Paenarthrobacter	0	1	0	0
Firmicutes	Bacilli	Paenibacillales	Paenibacillaceae	Paenibacillus	73	346	181	67
Firmicutes	Clostridia	Peptostreptococcales-Tissierellales	Peptostreptococcaceae	Paeniclostridium	0	0	0	0
Proteobacteria	Alphaproteobacteria	Rhodobacterales	Rhodobacteraceae	Paenirhodobacter	0	0	0	0
Firmicutes	Bacilli	Bacillales	Planococcaceae	Paenisporosarcina	0	0	0	0
Myxococcota	Polyangia	Polyangiales	Polyangiaceae	Pajaroellobacter	0	0	0	0
Bacteroidota	Bacteroidia	Bacteroidales	Paludibacteraceae	Paludibacter	0	0	0	0
Planctomycetota	Planctomycetes	Isosphaerales	Isosphaeraceae	Paludisphaera	0	0	0	0
Proteobacteria	Gammaproteobacteria	Salinisphaerales	Solimonadaceae	Panacagrimonas	0	0	0	0
Bacteroidota	Bacteroidia	Bacteroidales	Tannerellaceae	Parabacteroides	66	0	4	0
Proteobacteria	Alphaproteobacteria	Sphingomonadales	Sphingomonadaceae	Parablastomonas	0	76	0	0
Proteobacteria	Alphaproteobacteria	Rhodobacterales	Rhodobacteraceae	Paracoccus	625	653	108	0
Bacteroidota	Bacteroidia	Chitinophagales	Chitinophagaceae	Parafilimonas	0	0	0	0
Proteobacteria	Gammaproteobacteria	Enterobacterales	Alteromonadaceae	Paraglaciecola	0	0	0	0
Bacteroidota	Bacteroidia	Bacteroidales	Prevotellaceae	Paraprevotella	0	0	0	0
Bacteroidota	Bacteroidia	Chitinophagales	Chitinophagaceae	Parasegetibacter	0	0	0	0
Proteobacteria	Alphaproteobacteria	Sphingomonadales	Sphingomonadaceae	Parasphingopyxis	0	0	96	0
Actinobacteriota	Thermoleophilia	Solirubrobacterales	Solirubrobacteraceae	Parviterribacter	0	0	0	0
Actinobacteriota	Thermoleophilia	Solirubrobacterales	Solirubrobacteraceae	Patulibacter	0	0	0	0
Proteobacteria	Gammaproteobacteria	Burkholderiales	Comamonadaceae	Paucibacter	0	0	0	0
Bacteroidota	Bacteroidia	Sphingobacteriales	Sphingobacteriaceae	Pedobacter	0	0	94	130
Actinobacteriota	Actinobacteria	Micrococcales	Intrasporangiaceae	Pedococcus-Phycicoccus	0	0	0	0
Proteobacteria	Alphaproteobacteria	Rhizobiales	Hyphomicrobiaceae	Pedomicrobium	0	231	0	71
Proteobacteria	Alphaproteobacteria	Kiloniellales	Kiloniellaceae	Pelagibius	0	61	0	0
Firmicutes	Negativicutes	Veillonellales-Selenomonadales	Sporomusaceae	Pelosinus	0	0	0	0
Bdellovibrionota	Bdellovibrionia	Bacteriovoracales	Bacteriovoracaceae	Peredibacter	58	0	0	0
Proteobacteria	Gammaproteobacteria	Pseudomonadales	Moraxellaceae	Permianibacter	77	65	0	0
Verrucomicrobiota	Verrucomicrobiae	Verrucomicrobiales	Rubritaleaceae	Persicirhabdus	0	0	85	0
Thermotogota	Thermotogae	Petrotogales	Petrotogaceae	Petrotoga	0	0	0	0
Myxococcota	Polyangia	Polyangiales	Phaselicystidaceae	Phaselicystis	0	0	0	60
Proteobacteria	Alphaproteobacteria	Caulobacterales	Caulobacteraceae	Phenylobacterium	85	91	0	0
Cyanobacteria	Cyanobacteriia	Phormidesmiales	Phormidesmiaceae	Phormidesmis ANT.LACV5.1	0	80	0	0
Proteobacteria	Gammaproteobacteria	Enterobacterales	Vibrionaceae	Photobacterium	431	606	307	319
Proteobacteria	Alphaproteobacteria	Rhizobiales	Rhizobiales Incertae Sedis	Phreatobacter	58	0	0	0
Proteobacteria	Alphaproteobacteria	Rhizobiales	Rhizobiaceae	Phyllobacterium	0	0	0	0
Actinobacteriota	Actinobacteria	Micromonosporales	Micromonosporaceae	Phytohabitans	0	0	0	0
Planctomycetota	Planctomycetes	Pirellulales	Pirellulaceae	Pir4 lineage	130	413	0	232
Planctomycetota	Planctomycetes	Pirellulales	Pirellulaceae	Pirellula	859	1148	651	626
Proteobacteria	Gammaproteobacteria	Burkholderiales	Comamonadaceae	Piscinibacter	0	0	0	0
Planctomycetota	Planctomycetes	Planctomycetales	Rubinisphaeraceae	Planctomicrobium	0	125	0	28
Planctomycetota	Planctomycetes	Planctomycetales	Schlesneriaceae	Planctopirus	0	0	0	0
Proteobacteria	Alphaproteobacteria	Rhodobacterales	Rhodobacteraceae	Planktomarina	0	0	0	0
Proteobacteria	Gammaproteobacteria	Enterobacterales	Enterobacteriaceae	Plesiomonas	0	0	0	63
Proteobacteria	Gammaproteobacteria	Burkholderiales	Comamonadaceae	Polaromonas	0	0	0	0
Myxococcota	Polyangia	Polyangiales	Polyangiaceae	Polyangium	0	0	0	0
Firmicutes	Bacilli	Thermoactinomycetales	Thermoactinomycetaceae	Polycladomyces	0	0	0	0
Proteobacteria	Gammaproteobacteria	Salinisphaerales	Solimonadaceae	Polycyclovorans	72	70	0	0
Proteobacteria	Gammaproteobacteria	Burkholderiales	Burkholderiaceae	Polynucleobacter	219	523	3390	2672
Bacteroidota	Bacteroidia	Cytophagales	Hymenobacteraceae	Pontibacter	0	0	0	0
Proteobacteria	Gammaproteobacteria	Pseudomonadales	Porticoccaceae	Porticoccus	0	0	0	0
Campylobacterota	Campylobacteria	Campylobacterales	Arcobacteraceae	Poseidonibacter	76	0	0	0
Fibrobacterota	Fibrobacteria	Fibrobacterales	Fibrobacteraceae	possible genus 04	0	0	0	0
Proteobacteria	Gammaproteobacteria	Steroidobacterales	Steroidobacteraceae	Povalibacter	0	0	0	0
Bacteroidota	Bacteroidia	Bacteroidales	Prevotellaceae	Prevotellaceae NK3B31 group	0	0	0	0
Cyanobacteria	Cyanobacteriia	Synechococcales	Cyanobiaceae	Prochlorococcus MIT9313	214	302	278	274
Actinobacteriota	Actinobacteria	Micrococcales	Promicromonosporaceae	Promicromonospora	0	0	0	0
Actinobacteriota	Actinobacteria	Propionibacteriales	Propionibacteriaceae	Propionicimonas	21	42	0	0
Verrucomicrobiota	Verrucomicrobiae	Verrucomicrobiales	Verrucomicrobiaceae	Prosthecobacter	332	496	82	121
Firmicutes	Clostridia	Clostridiales	Clostridiaceae	Proteiniclasticum	104	89	0	0
Proteobacteria	Alphaproteobacteria	Rhizobiales	Rhizobiaceae	Pseudahrensia	0	0	0	0
Proteobacteria	Alphaproteobacteria	Rhizobiales	Rhizobiaceae	Pseudaminobacter	0	17	0	0
Actinobacteriota	Actinobacteria	Micrococcales	Micrococcaceae	Pseudarthrobacter	145	718	38	119
Myxococcota	Polyangia	Nannocystales	Nannocystaceae	Pseudenhygromyxa	0	0	0	0
Proteobacteria	Gammaproteobacteria	Enterobacterales	Pseudoalteromonadaceae	Pseudoalteromonas	0	0	0	0
Firmicutes	Clostridia	Oscillospirales	Hungateiclostridiaceae	Pseudobacteroides	0	0	0	0
Proteobacteria	Gammaproteobacteria	Burkholderiales	Oxalobacteraceae	Pseudoduganella	0	0	0	0
Bacteroidota	Bacteroidia	Chitinophagales	Chitinophagaceae	Pseudoflavitalea	0	0	0	0
Proteobacteria	Gammaproteobacteria	Burkholderiales	Chromobacteriaceae	Pseudogulbenkiania	0	0	0	0
Proteobacteria	Gammaproteobacteria	Pseudomonadales	Pseudohongiellaceae	Pseudohongiella	0	0	64	0
Proteobacteria	Alphaproteobacteria	Rhizobiales	Xanthobacteraceae	Pseudolabrys	37	59	58	0
Proteobacteria	Gammaproteobacteria	Pseudomonadales	Pseudomonadaceae	Pseudomonas	25674	38590	26078	34596
Actinobacteriota	Actinobacteria	Pseudonocardiales	Pseudonocardiaceae	Pseudonocardia	70	64	0	0
Proteobacteria	Alphaproteobacteria	Rhodobacterales	Rhodobacteraceae	Pseudorhodobacter	35	33	0	0
Proteobacteria	Gammaproteobacteria	Burkholderiales	Comamonadaceae	Pseudorhodoferax	0	0	0	0
Proteobacteria	Alphaproteobacteria	Rhizobiales	Xanthobacteraceae	Pseudorhodoplanes	0	0	43	0
Proteobacteria	Alphaproteobacteria	Rhizobiales	Xanthobacteraceae	Pseudoxanthobacter	62	0	78	0
Proteobacteria	Gammaproteobacteria	Xanthomonadales	Xanthomonadaceae	Pseudoxanthomonas	343	276	159	123
Firmicutes	Bacilli	Bacillales	Planococcaceae	Psychrobacillus	0	0	0	0
Proteobacteria	Gammaproteobacteria	Pseudomonadales	Moraxellaceae	Psychrobacter	14	0	0	0
Proteobacteria	Alphaproteobacteria	Rhizobiales	Beijerinckiaceae	Psychroglaciecola	0	0	0	0
Bacteroidota	Bacteroidia	Chitinophagales	Chitinophagaceae	Puia	0	0	0	0
Proteobacteria	Alphaproteobacteria	Sphingomonadales	Sphingomonadaceae	Qipengyuania	0	0	0	0
Actinobacteriota	Actinobacteria	Kineosporiales	Kineosporiaceae	Quadrisphaera	0	0	0	0
Proteobacteria	Gammaproteobacteria	Burkholderiales	Rhodocyclaceae	Quatrionicoccus	0	0	0	0
Verrucomicrobiota	Kiritimatiellae	Kiritimatiellales	Kiritimatiellaceae	R76-B128	58	0	0	59
Proteobacteria	Gammaproteobacteria	Burkholderiales	Burkholderiaceae	Ralstonia	164	120	140	110
Proteobacteria	Gammaproteobacteria	Burkholderiales	Comamonadaceae	Ramlibacter	68	50	0	0
Acidobacteriota	Blastocatellia	Pyrinomonadales	Pyrinomonadaceae	RB41	58	231	101	22
Proteobacteria	Alphaproteobacteria	Reyranellales	Reyranellaceae	Reyranella	89	159	115	111
Bacteroidota	Bacteroidia	Cytophagales	Spirosomaceae	Rhabdobacter	0	0	0	0
Proteobacteria	Gammaproteobacteria	Burkholderiales	Comamonadaceae	Rhizobacter	0	0	0	0
Actinobacteriota	Actinobacteria	Micromonosporales	Micromonosporaceae	Rhizocola	0	10	0	0
Proteobacteria	Alphaproteobacteria	Sphingomonadales	Sphingomonadaceae	Rhizorhapis	0	0	0	0
Proteobacteria	Gammaproteobacteria	Xanthomonadales	Rhodanobacteraceae	Rhodanobacter	0	182	51	0
Proteobacteria	Alphaproteobacteria	Rhodobacterales	Rhodobacteraceae	Rhodobacter	285	415	325	252
Actinobacteriota	Actinobacteria	Corynebacteriales	Nocardiaceae	Rhodococcus	0	77	0	0
Bacteroidota	Bacteroidia	Cytophagales	Cytophagaceae	Rhodocytophaga	0	0	0	0
Proteobacteria	Gammaproteobacteria	Burkholderiales	Comamonadaceae	Rhodoferax	74	0	0	0
Proteobacteria	Alphaproteobacteria	Parvibaculales	Parvibaculaceae	Rhodoligotrophos	0	0	0	0
Proteobacteria	Alphaproteobacteria	Rhizobiales	Rhodomicrobiaceae	Rhodomicrobium	0	29	23	0
Planctomycetota	Planctomycetes	Pirellulales	Pirellulaceae	Rhodopirellula	0	21	81	247
Proteobacteria	Alphaproteobacteria	Rhizobiales	Xanthobacteraceae	Rhodoplanes	66	0	0	104
Proteobacteria	Alphaproteobacteria	Rhizobiales	Xanthobacteraceae	Rhodopseudomonas	0	0	0	0
Proteobacteria	Alphaproteobacteria	Acetobacterales	Acetobacteraceae	Rhodovastum	0	0	0	0
Proteobacteria	Alphaproteobacteria	Rhodobacterales	Rhodobacteraceae	Rhodovulum	0	0	0	0
Proteobacteria	Gammaproteobacteria	Diplorickettsiales	Diplorickettsiaceae	Rickettsiella	0	0	0	0
Firmicutes	Clostridia	Peptostreptococcales-Tissierellales	Peptostreptococcaceae	Romboutsia	240	145	125	98
Firmicutes	Clostridia	Lachnospirales	Lachnospiraceae	Roseburia	68	59	58	59
Verrucomicrobiota	Verrucomicrobiae	Verrucomicrobiales	Rubritaleaceae	Roseibacillus	0	0	0	63
Bacteroidota	Bacteroidia	Bacteroidales	Prolixibacteraceae	Roseimarinus	0	0	77	0
Verrucomicrobiota	Verrucomicrobiae	Verrucomicrobiales	Verrucomicrobiaceae	Roseimicrobium	52	0	0	0
Gemmatimonadota	Gemmatimonadetes	Gemmatimonadales	Gemmatimonadaceae	Roseisolibacter	0	0	0	0
Proteobacteria	Alphaproteobacteria	Rhodobacterales	Rhodobacteraceae	Roseobacter	0	0	0	39
Proteobacteria	Alphaproteobacteria	Rhodobacterales	Rhodobacteraceae	Roseobacter clade Marinomonas lineage	0	0	0	0
Proteobacteria	Alphaproteobacteria	Rhodobacterales	Rhodobacteraceae	Roseobacter clade NAC11-7 lineage	36	0	0	0
Proteobacteria	Alphaproteobacteria	Acetobacterales	Acetobacteraceae	Roseococcus	0	0	0	0
Proteobacteria	Alphaproteobacteria	Acetobacterales	Acetobacteraceae	Roseomonas	179	85	0	91
Proteobacteria	Alphaproteobacteria	Rhodobacterales	Rhodobacteraceae	Roseovarius	0	0	0	0
Verrucomicrobiota	Verrucomicrobiae	Pedosphaerales	Pedosphaeraceae	RS25G	0	0	0	0
Proteobacteria	Alphaproteobacteria	Rhodobacterales	Rhodobacteraceae	Rubellimicrobium	45	47	0	0
Planctomycetota	Planctomycetes	Pirellulales	Pirellulaceae	Rubripirellula	0	0	0	0
Proteobacteria	Alphaproteobacteria	Acetobacterales	Acetobacteraceae	Rubritepida	0	0	0	0
Proteobacteria	Gammaproteobacteria	Burkholderiales	Comamonadaceae	Rubrivivax	158	183	48	0
Actinobacteriota	Rubrobacteria	Rubrobacterales	Rubrobacteriaceae	Rubrobacter	103	28	0	0
Proteobacteria	Alphaproteobacteria	Rhodobacterales	Rhodobacteraceae	Ruegeria	92	71	182	269
Firmicutes	Clostridia	Oscillospirales	Hungateiclostridiaceae	Ruminiclostridium	0	64	0	0
Firmicutes	Clostridia	Oscillospirales	Ruminococcaceae	Ruminococcus	128	187	120	222
Bacteroidota	Bacteroidia	Cytophagales	Spirosomaceae	Runella	167	237	46	82
Actinobacteriota	Actinobacteria	Pseudonocardiales	Pseudonocardiaceae	Saccharothrix	0	0	0	0
Proteobacteria	Gammaproteobacteria	Pseudomonadales	Halomonadaceae	Salinicola	0	0	0	0
Proteobacteria	Alphaproteobacteria	Rhodobacterales	Rhodobacteraceae	Salinihabitans	0	0	59	0
Actinobacteriota	Actinobacteria	Micromonosporales	Micromonosporaceae	Salinispora	0	0	0	0
Myxococcota	Polyangia	Polyangiales	Sandaracinaceae	Sandaracinus	0	0	0	0
Verrucomicrobiota	Verrucomicrobiae	Pedosphaerales	Pedosphaeraceae	SCGC AAA164-E04	0	0	0	0
Chloroflexi	Dehalococcoidia	GIF9	AB-539-J10	SCGC-AB-539-J10	0	0	0	65
Proteobacteria	Gammaproteobacteria	Burkholderiales	Comamonadaceae	Schlegelella	0	0	0	0
Planctomycetota	Planctomycetes	Planctomycetales	Schlesneriaceae	Schlesneria	0	0	0	0
Firmicutes	Clostridia	Peptostreptococcales-Tissierellales	Sedimentibacteraceae	Sedimentibacter	0	0	0	0
Bacteroidota	Bacteroidia	Chitinophagales	Chitinophagaceae	Sediminibacterium	71	121	179	194
Desulfobacterota	Desulfobacteria	Desulfobacterales	Desulfosarcinaceae	SEEP-SRB1	0	0	0	71
Actinobacteriota	Coriobacteriia	Coriobacteriales	Eggerthellaceae	Senegalimassilia	63	0	0	0
Proteobacteria	Gammaproteobacteria	Enterobacterales	Yersiniaceae	Serratia	224	124	141	56
Proteobacteria	Gammaproteobacteria	Enterobacterales	Shewanellaceae	Shewanella	0	65	0	0
Firmicutes	Bacilli	Thermoactinomycetales	Thermoactinomycetaceae	Shimazuella	0	0	0	0
Proteobacteria	Alphaproteobacteria	Rhizobiales	Rhizobiaceae	Shinella	59	80	91	82
Planctomycetota	Planctomycetes	Planctomycetales	Rubinisphaeraceae	SH-PL14	0	90	0	54
Proteobacteria	Alphaproteobacteria	Acetobacterales	Acetobacteraceae	Siccirubricoccus	0	0	0	0
Proteobacteria	Alphaproteobacteria	Rhodobacterales	Rhodobacteraceae	Silicimonas	0	0	0	0
Planctomycetota	Planctomycetes	Isosphaerales	Isosphaeraceae	Singulisphaera	0	0	0	0
Proteobacteria	Alphaproteobacteria	Azospirillales	Azospirillaceae	Skermanella	54	365	78	0
Planctomycetota	Phycisphaerae	Phycisphaerales	Phycisphaeraceae	SM1A02	90	139	0	0
Actinobacteriota	Actinobacteria	Corynebacteriales	Nocardiaceae	Smaragdicoccus	0	0	0	0
Firmicutes	Bacilli	Bacillales	Planococcaceae	Solibacillus	0	0	0	0
Proteobacteria	Gammaproteobacteria	Salinisphaerales	Solimonadaceae	Solimonas	0	0	0	0
Actinobacteriota	Thermoleophilia	Solirubrobacterales	Solirubrobacteraceae	Solirubrobacter	76	29	0	0
Myxococcota	Polyangia	Polyangiales	Polyangiaceae	Sorangium	0	59	49	0
Chloroflexi	Chloroflexia	Thermomicrobiales	Thermomicrobiaceae	Sphaerobacter	0	0	0	0
Proteobacteria	Gammaproteobacteria	Burkholderiales	Comamonadaceae	Sphaerotilus	332	476	430	230
Proteobacteria	Alphaproteobacteria	Sphingomonadales	Sphingomonadaceae	Sphingoaurantiacus	0	0	0	0
Bacteroidota	Bacteroidia	Sphingobacteriales	Sphingobacteriaceae	Sphingobacterium	125	0	129	82
Proteobacteria	Alphaproteobacteria	Sphingomonadales	Sphingomonadaceae	Sphingobium	100	195	75	0
Proteobacteria	Alphaproteobacteria	Sphingomonadales	Sphingomonadaceae	Sphingomonas	3457	3704	2055	2883
Proteobacteria	Alphaproteobacteria	Sphingomonadales	Sphingomonadaceae	Sphingopyxis	191	76	0	58
Proteobacteria	Alphaproteobacteria	Sphingomonadales	Sphingomonadaceae	Sphingorhabdus	0	0	0	59
Proteobacteria	Alphaproteobacteria	Sphingomonadales	Sphingomonadaceae	Sphingosinicella	0	0	0	0
Actinobacteriota	Actinobacteria	Streptosporangiales	Thermomonosporaceae	Spirillospora	0	0	0	0
Spirochaetota	Spirochaetia	Spirochaetales	Spirochaetaceae	Spirochaeta	90	0	0	0
Bacteroidota	Bacteroidia	Flavobacteriales	Flavobacteriaceae	Spongiibacterium	0	0	0	0
Actinobacteriota	Actinobacteria	Frankiales	Sporichthyaceae	Sporichthya	0	0	0	0
Bacteroidota	Bacteroidia	Cytophagales	Cytophagaceae	Sporocytophaga	0	0	0	0
Firmicutes	Negativicutes	Veillonellales-Selenomonadales	Sporomusaceae	Sporomusa	0	0	0	0
Firmicutes	Bacilli	Bacillales	Planococcaceae	Sporosarcina	0	93	0	0
Firmicutes	Bacilli	Staphylococcales	Staphylococcaceae	Staphylococcus	0	41	0	68
Proteobacteria	Alphaproteobacteria	Rhizobiales	Xanthobacteraceae	Starkeya	0	0	0	0
Acidobacteriota	Blastocatellia	Blastocatellales	Blastocatellaceae	Stenotrophobacter	0	41	0	0
Proteobacteria	Gammaproteobacteria	Xanthomonadales	Xanthomonadaceae	Stenotrophomonas	208	263	48	195
Proteobacteria	Gammaproteobacteria	Steroidobacterales	Steroidobacteraceae	Steroidobacter	0	59	0	0
Firmicutes	Bacilli	Lactobacillales	Streptococcaceae	Streptococcus	116	96	25	0
Actinobacteriota	Actinobacteria	Streptomycetales	Streptomycetaceae	Streptomyces	132	243	0	91
Actinobacteriota	Actinobacteria	Streptosporangiales	Streptosporangiaceae	Streptosporangium	0	44	0	0
Firmicutes	Clostridia	Oscillospirales	Ruminococcaceae	Subdoligranulum	279	249	219	298
Acidobacteriota	Thermoanaerobaculia	Thermoanaerobaculales	Thermoanaerobaculaceae	Subgroup 10	71	363	60	0
Proteobacteria	Gammaproteobacteria	Acidiferrobacterales	Acidiferrobacteraceae	Sulfurifustis	0	0	0	0
Campylobacterota	Campylobacteria	Campylobacterales	Sulfurimonadaceae	Sulfurimonas	0	74	259	249
Campylobacterota	Campylobacteria	Campylobacterales	Sulfurovaceae	Sulfurovum	208	428	88	223
Sumerlaeota	Sumerlaeia	Sumerlaeales	Sumerlaeaceae	Sumerlaea	0	41	0	0
Proteobacteria	Gammaproteobacteria	Pseudomonadales	Thioglobaceae	SUP05 cluster	204	63	52	72
Desulfobacterota	Desulfobacteria	Desulfobacterales	Desulfosarcinaceae	Sva0081 sediment group	0	0	0	66
Actinobacteriota	Acidimicrobiia	Microtrichales	Microtrichaceae	Sva0996 marine group	0	38	0	140
Proteobacteria	Alphaproteobacteria	Caulobacterales	Hyphomonadaceae	SWB02	0	0	0	0
Firmicutes	Symbiobacteriia	Symbiobacteriales	Symbiobacteraceae	Symbiobacterium	0	0	0	61
Cyanobacteria	Cyanobacteriia	Synechococcales	Cyanobiaceae	Synechococcus CC9902	176	158	127	193
Proteobacteria	Gammaproteobacteria	Nitrosococcales	Nitrosococcaceae	SZB85	0	0	0	0
Proteobacteria	Alphaproteobacteria	Rhodobacterales	Rhodobacteraceae	Tabrizicola	114	74	88	78
Proteobacteria	Gammaproteobacteria	Xanthomonadales	Rhodanobacteraceae	Tahibacter	0	0	0	75
Proteobacteria	Alphaproteobacteria	Rhodobacterales	Rhodobacteraceae	Tateyamaria	0	63	0	0
Planctomycetota	Planctomycetes	Gemmatales	Gemmataceae	Telmatocola	0	0	0	0
Bacteroidota	Bacteroidia	Flavobacteriales	Flavobacteriaceae	Tenacibaculum	0	0	0	0
Firmicutes	Clostridia	Peptostreptococcales-Tissierellales	Family XI	Tepidimicrobium	0	58	0	64
Planctomycetota	Phycisphaerae	Tepidisphaerales	Tepidisphaeraceae	Tepidisphaera	0	0	0	0
Firmicutes	Bacilli	Bacillales	Bacillaceae	Terribacillus	0	0	0	0
Verrucomicrobiota	Verrucomicrobiae	Chthoniobacterales	Terrimicrobiaceae	Terrimicrobium	0	103	0	59
Bacteroidota	Bacteroidia	Chitinophagales	Chitinophagaceae	Terrimonas	0	0	0	0
Firmicutes	Clostridia	Peptostreptococcales-Tissierellales	Peptostreptococcaceae	Terrisporobacter	0	0	0	63
Actinobacteriota	Actinobacteria	Propionibacteriales	Propionibacteriaceae	Tessaracoccus	112	53	0	0
Proteobacteria	Gammaproteobacteria	Enterobacterales	Colwelliaceae	Thalassotalea	0	0	0	0
Proteobacteria	Gammaproteobacteria	Burkholderiales	Rhodocyclaceae	Thauera	432	506	236	108
Firmicutes	Bacilli	Thermoactinomycetales	Thermoactinomycetaceae	Thermoactinomyces	0	0	0	58
Firmicutes	Bacilli	Paenibacillales	Paenibacillaceae	Thermobacillus	0	0	0	0
Firmicutes	Bacilli	Thermoactinomycetales	Thermoactinomycetaceae	Thermoflavimicrobium	0	0	0	0
Chloroflexi	Anaerolineae	Thermoflexales	Thermoflexaceae	Thermoflexus	0	0	0	140
Proteobacteria	Gammaproteobacteria	Xanthomonadales	Xanthomonadaceae	Thermomonas	89	67	0	0
Actinobacteriota	Actinobacteria	Streptosporangiales	Streptosporangiaceae	Thermopolyspora	0	0	0	70
Proteobacteria	Gammaproteobacteria	Burkholderiales	Hydrogenophilaceae	Thiobacillus	0	0	0	0
Proteobacteria	Alphaproteobacteria	Rhodobacterales	Rhodobacteraceae	Thioclava	107	106	0	0
Proteobacteria	Gammaproteobacteria	Ectothiorhodospirales	Ectothiorhodospiraceae	Thiogranum	139	103	319	257
Proteobacteria	Gammaproteobacteria	Ectothiorhodospirales	Thioalkalispiraceae	Thiohalophilus	0	0	73	0
Proteobacteria	Gammaproteobacteria	Thiomicrospirales	Thiomicrospiraceae	Thiomicrorhabdus	0	0	0	0
Proteobacteria	Gammaproteobacteria	Thiotrichales	Thiotrichaceae	Thiothrix	1048	976	104	126
Proteobacteria	Alphaproteobacteria	Tistrellales	Tistrellaceae	Tistrella	0	30	58	18
Patescibacteria	Saccharimonadia	Saccharimonadales	Saccharimonadaceae	TM7a	0	0	0	62
Cyanobacteria	Cyanobacteriia	Cyanobacteriales	Nostocaceae	Tolypothrix	0	0	0	0
Firmicutes	Bacilli	Lactobacillales	Carnobacteriaceae	Trichococcus	791	947	0	0
Proteobacteria	Alphaproteobacteria	Rhodobacterales	Rhodobacteraceae	Tropicibacter	0	0	0	63
Deinococcota	Deinococci	Deinococcales	Trueperaceae	Truepera	0	0	0	0
Firmicutes	Bacilli	Bacillales	Sporolactobacillaceae	Tuberibacillus	85	75	215	79
Firmicutes	Bacilli	Alicyclobacillales	Alicyclobacillaceae	Tumebacillus	193	61	101	133
Planctomycetota	Planctomycetes	Isosphaerales	Isosphaeraceae	Tundrisphaera	82	133	0	0
Firmicutes	Bacilli	Erysipelotrichales	Erysipelotrichaceae	Turicibacter	66	84	0	114
Spirochaetota	Leptospirae	Leptospirales	Leptospiraceae	Turneriella	0	0	0	0
Planctomycetota	Planctomycetes	Gemmatales	Gemmataceae	Tuwongella	75	108	0	0
Cyanobacteria	Cyanobacteriia	Cyanobacteriales	Phormidiaceae	Tychonema CCAP 1459-11B	151	360	0	51
Firmicutes	Clostridia	Oscillospirales	Oscillospiraceae	UCG-002	77	34	0	183
Firmicutes	Clostridia	Oscillospirales	Oscillospiraceae	UCG-005	0	0	0	0
Firmicutes	Clostridia	Oscillospirales	Hungateiclostridiaceae	UCG-012	0	66	0	96
Proteobacteria	Gammaproteobacteria	Burkholderiales	Rhodocyclaceae	Uliginosibacterium	46	0	0	0
Bacteroidota	Bacteroidia	Flavobacteriales	Flavobacteriaceae	Ulvibacter	0	0	0	0
Actinobacteriota	Actinobacteria	Pseudonocardiales	Pseudonocardiaceae	Umezawaea	0	0	0	0
Proteobacteria	Gammaproteobacteria	Burkholderiales	Oxalobacteraceae	Undibacterium	0	0	63	0
Planctomycetota	Phycisphaerae	Phycisphaerales	Phycisphaeraceae	Urania-1B-19 marine sediment group	0	66	0	59
Firmicutes	Bacilli	Bacillales	Bacillaceae	Ureibacillus	0	0	0	112
Bacteroidota	Bacteroidia	Chitinophagales	Chitinophagaceae	UTBCD1	0	63	0	0
Chloroflexi	Anaerolineae	Anaerolineales	Anaerolineaceae	UTCFX1	0	11	0	0
Proteobacteria	Gammaproteobacteria	Burkholderiales	Comamonadaceae	Variovorax	0	0	0	0
Firmicutes	Negativicutes	Veillonellales-Selenomonadales	Veillonellaceae	Veillonella	0	60	0	0
Verrucomicrobiota	Verrucomicrobiae	Opitutales	Puniceicoccaceae	Verruc-01	0	59	0	0
Verrucomicrobiota	Verrucomicrobiae	Verrucomicrobiales	Verrucomicrobiaceae	Verrucomicrobium	0	0	0	14
Actinobacteriota	Actinobacteria	Micromonosporales	Micromonosporaceae	Verrucosispora	0	0	0	0
Proteobacteria	Gammaproteobacteria	Enterobacterales	Vibrionaceae	Vibrio	0	0	0	0
Acidobacteriota	Vicinamibacteria	Vicinamibacterales	Vicinamibacteraceae	Vicinamibacter	0	54	0	0
Firmicutes	Bacilli	Bacillales	Bacillaceae	Virgibacillus	0	0	0	0
Actinobacteriota	Actinobacteria	Micromonosporales	Micromonosporaceae	Virgisporangium	0	0	0	0
Myxococcota	Myxococcia	Myxococcales	Vulgatibacteraceae	Vulgatibacter	0	0	0	0
Methylomirabilota	Methylomirabilia	Methylomirabilales	Methylomirabilaceae	wb1-A12	32	78	61	128
Bacteroidota	Bacteroidia	Bacteroidales	Prolixibacteraceae	WCHB1-32	0	0	0	0
Firmicutes	Bacilli	Lactobacillales	Lactobacillaceae	Weissella	0	0	0	58
Actinobacteriota	Actinobacteria	Corynebacteriales	Nocardiaceae	Williamsia	0	0	0	0
Bacteroidota	Bacteroidia	Flavobacteriales	Flavobacteriaceae	Winogradskyella	0	0	0	0
Proteobacteria	Gammaproteobacteria	Steroidobacterales	Woeseiaceae	Woeseia	0	186	0	179
Proteobacteria	Alphaproteobacteria	Rhizobiales	Xanthobacteraceae	Xanthobacter	30	32	23	37
Proteobacteria	Gammaproteobacteria	Xanthomonadales	Xanthomonadaceae	Xanthomonas	0	0	0	0
Firmicutes	Bacilli	Paenibacillales	Paenibacillaceae	Xylanibacillus	0	0	0	0
Proteobacteria	Gammaproteobacteria	Burkholderiales	Comamonadaceae	Xylophilus	0	0	0	0
Gemmatimonadota	Longimicrobia	Longimicrobiales	Longimicrobiaceae	YC-ZSS-LKJ147	59	0	0	0
Proteobacteria	Alphaproteobacteria	Rhodobacterales	Rhodobacteraceae	Yoonia-Loktanella	0	0	0	0
Proteobacteria	Alphaproteobacteria	Rhizobiales	Devosiaceae	Youhaiella	0	0	0	0
Planctomycetota	Planctomycetes	Gemmatales	Gemmataceae	Zavarzinella	0	0	0	0
Bacteroidota	Bacteroidia	Flavobacteriales	Flavobacteriaceae	Zeaxanthinibacter	0	0	0	0
Proteobacteria	Gammaproteobacteria	Burkholderiales	Rhodocyclaceae	Zoogloea	69	148	74	145
